# Supplementary material for: Can we normalise developmentally appropriate health care for young people in UK hospital settings? An ethnographic study
Source: PubMed Central journal article supplement (PMC6738748; doi:10.1136/bmjopen-2019-029107), 2019-09-09
Supplement: bmjopen-2019-029107.draft_revisions.pdf [file bmjopen-2019-029107.draft_revisions.pdf]

# BMJ Open

BMJ Open is committed to open peer review. As part of this commitment we make the peer review history of every article we publish publicly available.

When an article is published we post the peer reviewers' comments and the authors' responses online. We also post the versions of the paper that were used during peer review. These are the versions that the peer review comments apply to.

The versions of the paper that follow are the versions that were submitted during the peer review process. They are not the versions of record or the final published versions. They should not be cited or distributed as the published version of this manuscript.

BMJ Open is an open access journal and the full, final, typeset and author-corrected version of record of the manuscript is available on our site with no access controls, subscription charges or pay-per-view fees (<http://bmjopen.bmj.com>).

If you have any questions on BMJ Open's open peer review process please email [info.bmjopen@bmj.com](mailto:info.bmjopen@bmj.com)

# BMJ Open

## Exploring the potential to normalize developmentally appropriate healthcare for young people in hospitals

|                               |                                                                                                                                                                                                                                                                                                                                                                                                                                                                                                                                                                                                                                                                                                                                            |
|-------------------------------|--------------------------------------------------------------------------------------------------------------------------------------------------------------------------------------------------------------------------------------------------------------------------------------------------------------------------------------------------------------------------------------------------------------------------------------------------------------------------------------------------------------------------------------------------------------------------------------------------------------------------------------------------------------------------------------------------------------------------------------------|
| Journal:                      | <i>BMJ Open</i>                                                                                                                                                                                                                                                                                                                                                                                                                                                                                                                                                                                                                                                                                                                            |
| Manuscript ID                 | bmjopen-2019-029107                                                                                                                                                                                                                                                                                                                                                                                                                                                                                                                                                                                                                                                                                                                        |
| Article Type:                 | Research                                                                                                                                                                                                                                                                                                                                                                                                                                                                                                                                                                                                                                                                                                                                   |
| Date Submitted by the Author: | 11-Jan-2019                                                                                                                                                                                                                                                                                                                                                                                                                                                                                                                                                                                                                                                                                                                                |
| Complete List of Authors:     | Rapley, Tim; Northumbria University Department of Social Work and Communities, Social Work, Education and Community Wellbeing; Newcastle University, Institute of Health and Society<br>Farre, Albert; University of Dundee, School of Nursing and Health Sciences<br>Parr, Jeremy; Newcastle University, UK, Institute of Neuroscience<br>Wood, Victoria; University College London, Department of Applied Health Research<br>Reape, Debbie; Northumbria Healthcare NHS Foundation Trust<br>Dovey-Pearce, Gail; Northumbria Healthcare NHS Foundation Trust<br>McDonagh, Janet; University of Manchester, Arthritis Research UK Centre for Epidemiology, Centre for Musculoskeletal Research ; Manchester University NHS Foundation Trust |
| Keywords:                     | Adolescent Medicine, Adolescent Health Services, Developmentally Appropriate Healthcare, QUALITATIVE RESEARCH, Young Adults                                                                                                                                                                                                                                                                                                                                                                                                                                                                                                                                                                                                                |
|                               |                                                                                                                                                                                                                                                                                                                                                                                                                                                                                                                                                                                                                                                                                                                                            |

SCHOLARONE™  
Manuscripts

# Exploring the potential to normalize developmentally appropriate healthcare for young people in hospitals

Tim Rapley M.A., Ph.D. <sup>a,b\*</sup>, Albert Farre Ph.D.<sup>c</sup> Jeremy R Parr M.B.Ch.B., M.D. <sup>d</sup>, Victoria Wood Ph.D. <sup>e</sup>, Debbie Reape M.B.A. <sup>f</sup>, Gail Dovey-Pearce D.Clin.Psych. <sup>f</sup>, Janet E McDonagh M.B.B.S. M.D. <sup>g,h,i</sup>.

<sup>a</sup> Institute of Health and Society, Newcastle University, Newcastle upon Tyne, UK

<sup>b</sup> Department of Social Work, Education and Community Wellbeing, Northumbria University, Newcastle upon Tyne, UK

<sup>c</sup> School of Nursing and Health Sciences, Dundee, UK

<sup>d</sup> Institute of Neuroscience, Newcastle University, Newcastle upon Tyne, UK

<sup>e</sup> Department of Applied Health Research, University College London, London, UK

<sup>f</sup> Northumbria Healthcare NHS Foundation Trust, Tyne and Wear, UK

<sup>g</sup> Arthritis Research UK Centre for Epidemiology, Centre for Musculoskeletal Research, University of Manchester, Manchester, UK

<sup>h</sup> NIHR Manchester Biomedical Research Centre, Manchester University NHS Foundation Trust, Manchester, UK

<sup>i</sup> Manchester Academic Health Science Centre, Manchester, UK

\*Address correspondence to: Tim Rapley, M.A., Ph.D., Department of Social Work, Education and Community Wellbeing, Northumbria University, Coach Lane Campus West, Newcastle, UK, NE7 7XA. Phone: 0191 215 6136; Fax: None; Email: [tim.rapley@northumbria.ac.uk](mailto:tim.rapley@northumbria.ac.uk).

**Word Count:** 4253

**Key Words:** Adolescent Medicine; Adolescent Health Services; Developmentally Appropriate Healthcare; Qualitative Research; Young Adults.

## ABSTRACT

**Objective** The World Health Organisation has argued that adolescent-responsive health systems are required. Developmentally appropriate healthcare (DAH) for young people is one approach that could underpin this move. The aim of this study was to explore the potential for DAH to become normalized, to become a routine, taken-for-granted, element of clinical practice.

**Design** Qualitative ethnographic study. Analyses were based on procedures from first-generation grounded theory and theoretically informed by normalization process theory.

**Setting** Two tertiary and one secondary care hospital in England.

**Participants** 192 participants including health professionals (n=103) and managers (n= 72) were recruited. Approximately 1600 hours of non-participant observations were conducted, alongside 65 formal qualitative interviews.

**Results** We observed diverse values and commitments towards the care of young people and provision of DAH, including a distributed network of young person-orientated practitioners. Informal networks of trust existed, where specific people, teams or wards were understood to have the right skill-mix, or mind-set, or access to resources, to work effectively with young people. As young people move through an organisation, the preference is to direct them to other young person-orientated practitioners, so inequities in skills and experience can be self-sustaining. At two sites, initiatives around adolescent and young adult training remained mostly within these informal networks of trust. At another, through support by wider management, we observed a programme that sought to make the young people's healthcare visible across the organization, and to get people to reappraise values and commitment.

**Conclusion** To move towards normalization of DAH within an organisation, we cannot solely rely on informal networks and cultures of young person-orientated training, practice and mutual referral and support. Organisation-wide strategies and training are needed, to enable better integration and consistency of health services for all young people.

**Strengths and limitations of this study**

- This is the first ethnographic study addressing the provision of developmentally appropriate health care for young people.
- Exploring the provision of health care for young people over time, within specific teams and specialities, as well as across an organisation, enabled us to explore the diversity of ways that health care for young people is currently delivered within and across professionals, teams, wards and organisations.
- We only focused on three different organisations and all these organisations had a reputation for undertaking research on the care young people, so may represent examples of 'good practice'.

1  
2  
3  
4  
5 **Funding Statement:** This article presents independent research funded by the National Institute for  
6 Health Research (NIHR) under the Programme Grants for Applied Research programme: RP-PG-  
7 0610-10112. The views expressed in this article are those of the authors and not necessarily those of  
8 the NHS, the NIHR or the Department of Health. The funder took no part in the collection, analysis or  
9 interpretation of the data, in the writing of the article nor in the decision to submit the article for  
10 publication.  
11  
12  
13  
14

15  
16 **Competing interests:** All authors have completed the ICMJE uniform disclosure form and declare  
17 they have no financial relationships from any organisation that might have an interest in the  
18 submitted work in the previous three years; and no other relationships or activities that could  
19 appear to have influenced the submitted work.  
20  
21  
22

23 **Sponsor:** The study sponsor, Northumbria Healthcare NHS Foundation Trust, had no role in the study  
24 design, in the collection, analysis, and interpretation of data, in the writing of the report, or in the  
25 decision to submit the article for publication. VW had an honorary contract with Northumbria  
26 Healthcare, and GD-P and DR were employed by Northumbria Healthcare.  
27  
28  
29  
30

31  
32 **Author Contributions:** TR, JMCD, JP and DR designed the original study. VW and AF carried out data  
33 collection and data analysis under the supervision of TR, JMCD, DR, GD-P and JP. TR and AF led on  
34 the writing of this manuscript. All authors worked on drafts of the paper and approved the final  
35 version of this article.  
36  
37  
38

39  
40 **Acknowledgements:** We acknowledge the support of Dr Elizabeth Rankin for her support and the  
41 health professionals and staff at the 3 participating hospitals. \*\*The Transition Collaborative Group  
42 consists of: the authors of this paper; other co-applicants: Allan Colver, Helen McConachie, Mark S  
43 Pearce, Luke Vale, Caroline Bennett, Greg Maniatopoulos; advisors: Nichola Chater, Helena Gleeson.  
44  
45  
46  
47

48 **Data sharing:** No additional data is available. Data are difficult to anonymise and we had not sought  
49 permission for data sharing.  
50  
51

52  
53 **Supplementary Files:** Original Protocol; Standards for Reporting Qualitative Research (SRQR)  
54 Checklist.  
55  
56  
57  
58  
59  
60

## INTRODUCTION

The health of young people, defined by the World Health Organisation as any person between ages 10 and 24 years,[1] is a neglected yet pressing global issue [2] affecting the largest generation in history.[3] Youth-friendly healthcare [4], promoted as a means to improve health services for young people, has underpinned quality of care and policy frameworks.[5-7] However, as highlighted by the WHO, there is the need to move from the ad hoc provision of youth-friendly healthcare services to adolescent-responsive healthcare systems [8]. Other work has also noted that health system-level strategies are needed to further develop and improve healthcare for young people [9,10].

Healthcare providers need to respond to young people's changing developmental needs in a manner that is consistent, universal and provided across healthcare settings. Such adolescent-responsive health systems should be flexible, and should focus on a broad range of aspects of healthcare provision, from the frontline (such as how healthcare professionals communicate with young people) through to the higher levels of healthcare provision (such as how services are planned and commissioned).

Developmentally appropriate healthcare (DAH) for young people [11-13] is one concept that could underpin an adolescent-responsive healthcare system (See Table 1). In contrast to the more service-focussed nature of the youth friendly health service [14], DAH addresses the clinical approach to individual young people and specifically recognises the changing developmental needs of young people and the role of healthcare in addressing and supporting young people. DAH focuses on biopsychosocial development rather than chronological age. Chronological age is recognised to be a poor indicator of developmental status particularly in the context of a long-term health condition [15]. Young people make this journey to adulthood in their own way; young people's development does not have a fixed period attached to it. Many developmental milestones are met after reaching the legal age of adulthood [16,17].

### [Table 1]

Services underpinned by DAH have been reported nationally and internationally as a potential key mechanism to improve health outcomes for young people.[3,18] Increasing knowledge about the development of young people [19,20] offers unprecedented opportunities for service improvement. In the context of sub-optimal provision of healthcare for young people,[3,8] DAH offers the potential to transform traditional models of healthcare delivery into adolescent-responsive healthcare systems. However, the concept of DAH has been operationalized in a range of ways in the medical literature [11] and is understood in different ways by clinicians and managers in the NHS[12]. In this study, theoretically informed by Normalization Process Theory (NPT)[21], we investigated the

1  
2 potential for normalization of DAH within three UK hospitals. NPT identifies, characterises, and  
3 explains aspects of individual and collective behaviour shown to be important in empirical studies of  
4 the introduction, embedding and integration of change [21]. Normalization is achieved when a  
5 technique, technology or organisational change becomes a routine and taken-for-granted element  
6 of clinical practice.  
7  
8  
9  
10

## 11 12 13 **METHODS**

14  
15 This ethnographic study was conducted across three hospitals in England (a district general hospital,  
16 a large paediatric tertiary hospital and a large adult tertiary hospital) all with a history of  
17 championing research and innovative service provision for young people. Health professionals,  
18 recruited through six medical and surgical specialties (Diabetes, Emergency Care, General  
19 Paediatrics, Outpatients, Rheumatology, and Trauma and Orthopaedics), were chosen to represent  
20 the heterogeneous services found in UK National Health Service (NHS) hospitals. Managers were  
21 recruited at each site when their roles were relevant to the provision of services for young people in  
22 paediatrics and/or adult care. The study received a favourable opinion from the National Research  
23 Ethics Committee (12/NE/0423).  
24  
25  
26  
27  
28  
29  
30  
31  
32

33 Data collection took place over three phases, between June 2013 and January 2015. Recruitment  
34 was initially mediated through gatekeepers. Participants were purposively sampled, initially through  
35 maximum variation sampling and then refined through snowball and theoretical sampling. [22]  
36 Participants were approached using a variety of methods including face-to-face, telephone and  
37 email. A total of 192 participants (professionals and managers) were recruited (Table 2).  
38 Approximately 1600 hours of non-participant observations were conducted by two researchers, (AF,  
39 VW) alongside 65 formal qualitative interviews. Researchers had specific training and extensive  
40 experience in conducting qualitative research and had no relationship with the participants.  
41 Observations were recorded in contemporaneous fieldnotes. Formal interviews (average length, 45  
42 minutes) were audio-recorded, transcribed, edited to ensure respondents anonymity and then  
43 analysed alongside anonymised fieldnotes. Observation and interviews focused on the organisation  
44 of services for young people, including (intra-/inter-)organisational, team and individual aspects of  
45 provision, training and support, and patient involvement as well as emerging topics identified  
46 through concurrent data analysis.  
47  
48  
49  
50  
51  
52  
53  
54  
55  
56

57 **[Table 2]**  
58  
59  
60



1  
2  
3 All analysis was conducted according to the standard procedures of rigorous qualitative analysis by  
4 AF, VW and TR.[23] We used procedures from first-generation grounded theory - coding, constant  
5 comparison, memoing [24] - and from analytic induction, deviant case analysis.[25] Sampling, data  
6 collection and analysis occurred concurrently, so that issues raised in earlier phases of fieldwork  
7 were explored subsequently to enable conceptual saturation [26]. We undertook independent  
8 coding and cross checking, team data sessions and member validation with some of the participants  
9 in the fieldwork. The analysis was assisted by QSR NVivo 10 software and theoretically-informed by  
10 Normalization Process Theory.[21]

11  
12 This study was part of a larger longitudinal programme of research focused on the commissioning  
13 and provision of healthcare services for young people [27,28]. A young people's advisory group  
14 supported all studies within the programme. The group advised on practical (e.g. recruitment) and  
15 conceptual issues (e.g. discussion of key findings and concepts).

## 26 RESULTS

27  
28 We identified diverse values and commitments towards the care of young people and provision of  
29 DAH across organisations, specialities and staff. We observed a range of informal cultures of good  
30 practice implementing core elements of DAH, alongside formal and informal cultures of training  
31 around DAH and the provision of care of young people.

### 36 Diverse values and commitments

37  
38 When discussing the provision of care for young people, many focused on the need to create a more  
39 age appropriate environment, in terms of physical space, the visual and material culture of waiting  
40 room and wards. Others, especially those who worked regularly with young people, discussed  
41 features such as appropriate communication, confidentiality and a more holistic focus. As one  
42 manager noted:

43  
44 The young people have told us that, um, we need, they're not bothered about where they  
45 are seen so, as in, what the building's look like or what the clinic room looks like. They want  
46 to make sure that they see somebody who's interested and who knows what their disease is  
47 like, but also has an awareness of all the other stuff that's going on when they're 16 to 18  
48 (Manager, General Hospital)

49  
50 At this hospital, involvement was considered to be part of patient experience, and young people  
51 were involved in such activities as the, attendance at governance meetings and training of staff.  
52  
53  
54  
55  
56  
57  
58  
59  
60

1  
2  
3 Young people's experiences were an important influence on this manager's understanding of  
4 'appropriate' service provision.  
5

6  
7 There were conflicting views on the value and worth of enacting DAH across the organisations. The  
8 numbers of young people accessing health services were often portrayed as small, so in  
9 organisational terms they were 'just below the radar'. In contrast to older, especially elderly  
10 patients, they were also seen as 'very rarely unwell'. This led some to question whether  
11 professionals should be adjusting their practices or offering distinct, tailored, services, as there are  
12 always competing demands for resources, time and expertise.  
13  
14  
15

16  
17  
18 It's small enough [numbers] that if you don't, if you don't buy into it, there's plenty to be  
19 getting on with the other 90%. And everybody's jobs are so frantic that you could easily do a  
20 very good job with that 90% who are 25, 26 plus. ... So, you could actually ignore these  
21 young people completely. (Manager, Adult Hospital)  
22  
23  
24

25  
26 Questions of legitimacy and buy-in, or rather, enrolment, are central to individual, team and  
27 organisational change. In part, this lack of capacity and willingness seems to be compounded by the  
28 liminal status of young people within the organisational and professional culture of the UK  
29 healthcare system:  
30  
31

32  
33 Adults don't really want them because they are too young and the paediatricians don't really  
34 want them because they are too old (Health Professional, General Hospital).  
35  
36

37  
38 With the exception of charity-supported oncology wards, adolescent only wards, or spaces within  
39 wards, were rare and were often subject to dissolution if there were competing demands. None of  
40 the sites had a senior clinical or management lead with responsibility for young people's service  
41 development.  
42  
43

44  
45 However, across all the sites we did observe a complex network of young person-orientated  
46 practitioners, people acting as young people 'enthusiasts', or 'champions', within specific clinical or  
47 management teams in either a formal or informal capacity. Some specific services and practices  
48 were organised around the care of young people. However, relying on the enthusiasm and  
49 willingness of specific individuals can become problematic.  
50  
51  
52  
53  
54

55  
56 Several people have left, who have been very senior members and very adolescent minded  
57 and have been replaced by either rotational posts or part-time posts, so that continuity  
58  
59  
60

1  
2 within our team and the wealth of expertise has been impacted on significantly. (Health  
3 Professional, Paediatric Hospital).  
4  
5

6 A focus on champions raises key questions about the sustainability of services for young people over  
7 time.  
8  
9

### 10 **Informal cultures of good practice**

11  
12

13 Across all three hospitals, we observed local cultures – in teams, clinics, wards and meetings – where  
14 professionals attempted to enact a philosophy of care towards young people. They were driven by  
15 an awareness of how approaching young people in a different way can mean that young people  
16 ‘might take the right messages away, might not end up neglecting their health needs, damaging  
17 themselves’ (Manager, General Hospital). For these professionals, working with young people  
18 required a specific mind-set and skill-set.  
19  
20  
21  
22  
23

24 At its simplest level this often involved the ability of the professional, or the multi-disciplinary team,  
25 to communicate effectively, listening to young people about their health needs and asking them  
26 questions, about their broader psychosocial situation. Care is contextualised by gathering  
27 information about a young person’s life, including educational, vocational, social, friendship and  
28 family issues; and exploring risk and resilience factors. Such information is used by teams to  
29 generate an appropriate context for effective communication, inform interventions and to organise  
30 consultations, including offering appropriate health education and support for self-management.  
31  
32  
33  
34  
35

36 Providing an appropriate service for young people is often a deeply rooted value for these  
37 individuals and groups. The ‘You’re Welcome Quality Criteria’ [6] were generally well known,  
38 including core issues such confidentiality and consent, joined-up working, transition and  
39 accessibility. Within the context of adult care, failure to attend appointments was a prevalent issue.  
40 Ways of dealing with this varied and we were told about what was referred to as, ‘a softer approach  
41 to the DNAs (did not attend)’  
42  
43  
44  
45  
46  
47

48 The organisation ruling of one strike and you’re out, we don’t adhere to, so we will give  
49 them multiple attempts to come into clinic ... we don’t actually put them as a DNA, because  
50 they just booked in [the consultants] calendar but we don’t actually book it on the system so  
51 they don’t officially come as a DNA ... So I’ll make informal appointments with the young  
52 people and then, when they arrive we book them into clinic, so that way they don’t DNA  
53 (Health Professional, Adult Hospital).  
54  
55  
56  
57  
58  
59  
60

1  
2 Working creatively within the existing norms, rules and resources was characteristic of those who  
3 believed that young people needed to be recognized as a group with specific needs and approaches.  
4

5  
6 We observed across all the organisations ‘lots of great pockets of work’ as some specialties, teams,  
7 people or spaces offered very strong young person-orientated care. However, not all people or  
8 services felt it relevant to make ‘special arrangements’, but chose instead to treat young people like  
9 ‘an ordinary patient’. Alongside this, the uneven distribution of resources within and across  
10 specialties can create inequities of care.  
11  
12  
13  
14

15  
16 There are ... areas in the hospital who, because they have more funding or they’re funded in  
17 a different way, they might have a youth worker because it’s part of their team and just for  
18 their team. They might have a psychologist who is just part of their team. ... it very much  
19 depends on what speciality you’re unfortunate to fall into, depending on what illness you’ve  
20 got as to what service you then get. ... (Health Professional, Paediatric Hospital)  
21  
22  
23  
24

25 However, resources are not the only source of inequities. In part the inequities in skills and  
26 experience across the organisations seem to be self-sustaining within organisations. Those with an  
27 interest, the ‘enthusiasts’, are embedded in an informal network of care.  
28  
29

30  
31 we’ve now got a group of interested people across the [organisation]. So if a young person  
32 comes to me and they’ve got a, a joint problem, but they’ve also got a bowel problem, I  
33 know which bowel consultant and which bowel nurse will be the most appropriate to send  
34 them to. ... Um, so we’ve got a good group of people across the [organisation] that we can  
35 actually send these youngsters to who’ve got more awareness of the issues that they could  
36 have (Health Professional, General Hospital)  
37  
38  
39  
40  
41

42 An informal knowledge economy of young person-orientated practitioners and practices exists  
43 within the organisations. These are networks of trust. These referrals help to create, sustain and  
44 reinforce the network over time. This practice also exists across organisations, especially in terms of  
45 the transfer of young people to adult services. Young person-orientated practitioners refer to other  
46 young person-orientated practitioners – in this way, they work to actively avoid referring young  
47 people to those they feel maybe less young person-orientated. These people then gain less practical  
48 experience with managing these patients, and so less chance to reappraise their values and  
49 commitment to working with young people in new ways, as well as to develop the right skill-mix.  
50  
51  
52  
53  
54

55  
56 An informal network also existed in terms of spaces. At each site, at least one specific ward was  
57 known to offer more young person-orientated care. They were seen as repositories of knowledge  
58 and skills, able to advise on or manage potentially challenging behaviour.  
59  
60

1  
2  
3 We were getting so much enquiries regarding adolescents from the other wards, even just  
4 for the basics. ... So, they would ring us and say, "We can't get them out of bed in the  
5 morning". You know, "they just want to stay in bed all the time and they don't want to  
6 interact with anything". So we would say, "Well then you have to be stern, you know, you  
7 have to tell them, 'This is the plan,' you have to do a contract with them and agree with  
8 them that if they get over this time, then they can do this at this time" (Health Professional,  
9 Paediatric Hospital).

10  
11  
12  
13  
14  
15 It is not only that 'just different wards have a different tolerance', but rather that different wards  
16 and teams, develop, over time, different understanding and a different sense of what is legitimate  
17 work, as well as developmentally appropriate skills, competencies and routines.

18  
19  
20  
21 In some situations, we've had patients on our general wards where the parent has wanted  
22 to stay. And we, my nurses, would find that very strange. But actually, in oncology, that  
23 would not be strange at all. Because ... [they] would be used to that, even a patient could be  
24 22, 23 and still may want their mum. But they're not exposed to that in the main wards.  
25  
26  
27  
28 (Health Professional, Adult Hospital)

29  
30 Exposure to working with young people was central to enabling young people to become seen as  
31 just another 'young patient', over a set of unknown and unexpected concerns. Exposure offers a  
32 chance to adjust expectations and develop new skills.

### 33 34 35 36 **(In)formal cultures of training**

37  
38  
39 Within each of the organisations there were formal and informal groups at which the young person-  
40 orientated enthusiasts met and supported each other collectively. Essentially, these groups were a  
41 collective effort to promote initiatives to raise awareness across the organisations, create change,  
42 offer support and, importantly, learn from each other outwith their team, area or specialty.

43  
44  
45  
46 I have nothing in writing in my job plan that says I specialise in young people. ... Nobody said,  
47 "If you want to be a young adult person, you need to go on this [training course]". It's just  
48 something that I became aware of through organisations or talking to people. So, it's all  
49 quite ad-hoc rather than really, really planned. And it's just really by hearsay and talking to  
50 people and networking throughout [this organisation] over many years. (Health Professional,  
51 Paediatric Hospital)

1  
2  
3 Without any formalised professional routes available, the local, regional and national special  
4 interests groups became a central resource for supporting adolescent and young adult health  
5 training across the organisations.  
6  
7

8 At two hospitals, the only initiatives involving training around young people originated from their  
9 respective special interest groups, in the form of annual study days. At one of these hospitals, there  
10 was a policy initiative explicitly around transition, yet no specific training had been organised. At the  
11 other, development of a formal policy was said to be 'not a priority for the organisation'.  
12  
13  
14

15  
16 Priorities are the front door, A&E [Accident and Emergency], Clinical Decisions Unit, waiting  
17 times and, it's those things that they are being judged on.  
18

19  
20 Interviewer: Why do you think this is not a priority at all?  
21

22 Just because they've got bigger fish to fry. ... But it's not a priority for the [organization]  
23 because of all the other things by which they are measured. And young people's care isn't on  
24 that list. (Manager, Adult Hospital)  
25  
26  
27

28 In the current context of the factors that drive organisational change at this site, creating further  
29 engagement and buy-in from senior management were not seen as practical solution. Issues about  
30 the care of young people remained focused in the informal, organisation-wide group, of young  
31 people's enthusiasts. As we discovered, not everyone interested in the care of young people in that  
32 organisation was aware of the existence of that group. Even those within the group were often  
33 unaware of the range of young person-orientated initiatives that were occurring within their  
34 organisation.  
35  
36  
37  
38  
39

40  
41 At the remaining hospital specific training around the topic of DAH was observed being planned and  
42 delivered. A DAH strategy emerged as the result of the work of key people who sat on a transition  
43 strategy group. The group comprised of managers and health professionals, who met bi-monthly.  
44 There was strong cross-over between managerial and clinical levels and they worked to actively  
45 foster communication and create connections across services. The ideas emerged from the local  
46 special interest group, but the dissemination was targeted well beyond that group. Part of this  
47 involved looking where change was currently occurring within the organisation, alongside the  
48 broader national agendas on young people's health, in order to harness that momentum and get  
49 people involved.  
50  
51  
52  
53  
54  
55

56  
57 The focus of the strategy and training was on organisational level factors (e.g. staff appraisal  
58 including training goals around young people; provision of age-banded clinics), clinic and  
59  
60

1  
2  
3 consultation level factors (e.g. signpost sexual health, drug and alcohol services; copying clinic letters  
4 to young people), and training and awareness factors (e.g. adolescent development; confidentiality).  
5  
6 This programme of training had senior management support, albeit initially only from child health,  
7 alongside access to resources. Using money to 'back fill' was seen as a key component in the success  
8 of the roll-out of training, as without this departments would not only be unwilling but also unable  
9 to release staff for training.  
10  
11

12  
13 Last year we did, um, we did ten days, so ten individual day sessions for training in  
14 adolescent, basic adolescent health. Basically to increase awareness across the  
15 [organisation] so as to make sure it wasn't just the, the chronic illness patients that were  
16 being looked at ... but it was the patients coming through A&E, coming through X-ray ... just  
17 to get them aware of what a young person's needs are and why they're different to being an  
18 adult (Health Professional, General Hospital).  
19  
20  
21  
22  
23

24 Central norms and practices of good, every day, care for young people were distributed well beyond  
25 the local existing networks. The initiative emerged from, and depended on, their enthusiasm and  
26 expertise. The network of trust of young person-orientated practitioners was then supported by key  
27 actors within wider management. This led to an on-going training programme that sought to make  
28 the young people's healthcare visible across the organization, to begin to get to people to reappraise  
29 values and commitment.  
30  
31  
32  
33  
34  
35  
36  
37

## 38 **DISCUSSION**

39  
40 Across each organisation a complex, distributed, network of adolescent-oriented practitioners  
41 understood the potential value and worth of practices and services for young people, such as DAH.  
42 Within and across organisations there is an informal knowledge economy of young people-oriented  
43 practitioners, teams and spaces. People have a preference for referring to other young person-  
44 orientated practitioners or spaces, to others within their networks of trust. Such referrals help to  
45 create, sustain and reinforce the network over time. As such we see evidence of strong  
46 communities of practice [29], focused on supporting and enacting adolescent medicine. Table 3  
47 illustrates our results in relation to the four theoretical constructs of normalization process theory  
48 (NPT),[21]. The potential for normalization of DAH is high within the group of young person-oriented  
49 practitioners and managers, as they make sense of, buy-into, enact, and evaluate it as worthwhile.  
50 Beyond the networks of young person-oriented practitioners and managers, we observed a low  
51 potential for normalization. There are differences in opinion about the meaning and worth of DAH,  
52  
53  
54  
55  
56  
57  
58  
59  
60

1  
2  
3 its organisational and policy relevance, its potential workability, and its resource and spatial  
4 allocation. However, at one hospital, providing an organisation-wide strategy and training on  
5 organisational, team, clinic and consultation level factors offered a clear opportunity to increase the  
6 potential for normalization. It relied on buy-in and formal support from senior managers in both  
7 child and adult services to initiate and sustain it.  
8  
9  
10

### 11 [Table 3]

12  
13  
14 This is the first ethnographic study addressing the area of developmentally appropriate health care  
15 for young people. This study gathered considerable data from many sources. The focus on exploring  
16 the provision of health care for young people over time, within specific teams and specialities, as  
17 well as across an organisation, enabled us to demonstrate the diversity within and across  
18 professional, team, ward and organisational boundaries. However, we only focused on three  
19 different organisations. Notably, all these organisations had a reputation for undertaking research  
20 on the care young people, so may represent examples of 'good practice'. Given the timing of our  
21 fieldwork, we did not get the opportunity to observe the impact of the roll-out of training around  
22 DAH that occurred at the one of the NHS trusts.  
23  
24  
25  
26  
27  
28  
29

30 Policy and research has emphasised the centrality of service delivery and workforce capacity issues  
31 to achieve successful integration and consistency of health services for all young people across  
32 organisations [8, 9]. The results presented here add to this evidence base as we observed how the  
33 community of practice, the networks of young person-orientated practitioners and managers also  
34 support and provide, through formal and informal means, training and development around young  
35 people's health. Previous research has shown that continuing medical education in adolescent  
36 health, can increase developmentally appropriate practices (such as confidential services) and has  
37 the potential to address systemic barriers to healthcare for young people.[30] Thus, the role of such  
38 networks may be vital to achieving any sustainable change in the provision of healthcare for young  
39 people. Across all the sites, young people's formal and informal champions were key to getting  
40 people involved in the healthcare of young people. Research has outlined the importance of staff  
41 attitudes as a key determinant of young people's satisfaction with care.[4, 31] Prior research has  
42 also shown the problem of staff turnover, if services rely on key individuals [32,33] . As such, there  
43 needs to be consistency of approach to developing local cultures of good practice that can withstand  
44 changes in personnel. In primary care, the Adolescent Champion model, which trains a  
45 multidisciplinary team of practice staff to deliver training to other staff and implement local quality  
46 improvement, has shown potential for sustainable change [34].  
47  
48  
49  
50  
51  
52  
53  
54  
55  
56  
57  
58  
59  
60



1  
2  
3 Our findings suggest that there is a need for strong and clear guidelines, strategies and policies on  
4 the practical implementation of DAH at three levels: those of the individual young person and their  
5 family, the multidisciplinary team level and the organisation and/or system level. Our research  
6 informed the development of a freely-available online toolkit for implementation of DAH at these  
7 levels.[35,36] Since the fieldwork ended, additional guidance has been published including for the  
8 care of young people in acute care settings [37] which includes a focus on DAH, alongside national  
9 guidance on the need to implement DAH in relation to transitional care.[18] A focus on specific  
10 settings (like acute care) or contexts (like transition) has limitations as it can introduce or sustain  
11 inequities. Buy-in and formal support from senior managers in both child and adult services seems  
12 essential. Providing an institution-wide strategy and training seems key, particularly in view of the  
13 current unmet training needs reported in both paediatric [38] and adult physicians [39]. Currently  
14 adolescent and young adult medicine is not a recognised discipline in its own right in the UK unlike  
15 Australia and North America [40] although even when it is an established discipline, challenges  
16 remain, for example in the USA [41]. The 'informal' adolescent and young adult medicine community  
17 in the UK may also need to become more formally recognised. Young people should no longer be  
18 seen as 'vary rarely ill' or allowed to remain 'just below the radar', or seen as 'too old' for child  
19 services or 'too young' for adult. Core principles underlying the practice of adolescent medicine,  
20 such as DAH, should not remain contested. We need to enable people to reappraise values and  
21 commitment, to understand them as a normal part of everyday service provision.  
22  
23  
24  
25  
26  
27  
28  
29  
30  
31  
32  
33  
34  
35  
36  
37  
38  
39

## References

1. World Health Organization. Young people's health: a challenge for society. Report of a Study Group on Young People and 'Health for All by the Year 2000', Technical Report Series, No. 731. Geneva: World Health Organization, 1996.
2. Mokdad AH, Forouzanfar MH, Daoud F, et al. Global burden of diseases, injuries, and risk factors for young people's health during 1990–2013: a systematic analysis for the Global Burden of Disease Study 2013. *Lancet* 2016;387:2383–401.
3. Patton GC, Sawyer SM, Santelli JS, et al. Our future: a Lancet commission on adolescent health and wellbeing. *Lancet* 2016;387:2423–78.
4. Ambresin A-E, Bennett K, Patton GC, et al. Assessment of Youth-Friendly Health Care: A Systematic Review of Indicators Drawn From Young People's Perspectives. *J Adolesc Health* 2013;52:670–81.
5. Sawyer SM, Ambresin A-E, Bennett KE, et al. A Measurement Framework for Quality Health Care for Adolescents in Hospital. *J Adolesc Health* 2014;55:484–90.

- 1  
2  
3 6. Department of Health. You're welcome: Quality criteria for young people friendly services.  
4 2011. <https://www.gov.uk/government/publications/quality-criteria-for-young-people->  
5 friendly-health-services (accessed 13 December 2018)  
6
- 7  
8 7. Hargreaves DS, McDonagh JE, Viner RM. Validation of You're Welcome Quality Criteria for  
9 Adolescent Health Services Using Data From National Inpatient Surveys in England. *J Adolesc*  
10 *Health* 2013;52:50–57  
11
- 12  
13 8. World Health Organization. Towards adolescent-responsive health systems: Steering the  
14 transition from adolescent-friendly projects to adolescent-responsive health systems. 2014.  
15 <http://apps.who.int/adolescent/second-decade/section6/page8/sdolescent->  
16 responsiveness.html (accessed 13 Dec 2018)  
17
- 18  
19 9. Hepburn CM, Cohen E, Bhawra J, et al. Health system strategies supporting transition to  
20 adult care. *Arch Dis Child* 2015;100:559–64.  
21
- 22  
23 10. Hargreaves DS, Greaves F, Levay C, et al Comparison of Health Care Experience and Access  
24 Between Young and Older Adults in 11 High-Income Countries. *J Adolesc Health*. 2015  
25 Oct;57(4):413-20.  
26
- 27  
28 11. Farre A, Wood V, Rapley T, et al. Developmentally appropriate healthcare for young people:  
29 a scoping study. *Arch Dis Child* 2015;100:144–51.  
30
- 31  
32 12. Farre A, Wood V, McDonagh JE, et al. Health professionals' and managers' definitions of  
33 developmentally appropriate healthcare for young people: conceptual dimensions and  
34 embedded controversies. *Arch Dis Child* 2016;101:628–633.  
35
- 36  
37 13. Sawyer SM. Developmentally appropriate healthcare for young people with chronic illness:  
38 Questions of philosophy, policy, and practice. *Pediatr Pulmonol* 2003;36:363–365.  
39
- 40  
41 14. World Health Organisation. Geneva: World Health Organisation; 2002. Adolescent friendly  
42 health services: an agenda for change.  
43
- 44  
45 15. Wright EK, Williams J, Andrews JM et al. Perspectives of paediatric and adult  
46 gastroenterologists on transfer and transition care of adolescents with inflammatory bowel  
47 disease. *Intern Med J*. 2014 May;44(5):490-6.  
48
- 49  
50 16. Stollon N, Zhong Y, Ferris M, et al Chronological age when healthcare transition skills are  
51 mastered in adolescents/young adults with inflammatory bowel disease. *World J*  
52 *Gastroenterol*. 2017 May 14;23(18):3349-3355  
53
- 54  
55 17. Eaton CK, Davis MF, Gutierrez-Colina AM, et al Different Demands, Same Goal: Promoting  
56 Transition Readiness in Adolescents and Young Adults With and Without Medical Conditions.  
57 *J Adolesc Health*. 2017 Jun;60(6):727-733  
58  
59  
60

18. National Institute for Health and Care Excellence (NICE). NICE guidelines [NG43] Transition from children's to adults' services for young people using health or social care services. 2016. <https://www.nice.org.uk/guidance/ng43> (accessed 13 Dec 2018).
19. Sawyer SM, Afifi RA, Bearinger LH, et al. Adolescence: a foundation for future health. *Lancet* 2012;379:1630–40.
20. Viner R. Life stage: Adolescence. In: Davies SC, ed. Annual Report of the Chief Medical Officer 2012, Our Children Deserve Better: Prevention Pays. London: Department of Health 2013. Chapter 8 page 1-11.
21. May C, Finch T. Implementing, Embedding, and Integrating Practices: An Outline of Normalization Process Theory. *Sociology* 2009;43:535–54.
22. Patton MQ. Qualitative research & evaluation methods. London: Sage 2002.
23. Rapley T. Some Pragmatics of Data Analysis. In: Silverman D, ed. Qualitative Research. London: Sage 2016:331-346.
24. Glaser BG. The Constant Comparative Method of Qualitative Analysis. *Soc Probl* 1965;12:436–45.
25. Seale C. The Quality of Qualitative Research. London: Sage 1999.
26. Saunders B, Sim J, Kingstone T, et al. Saturation in qualitative research: exploring its conceptualization and operationalization. *Quality & Quantity*. 2018 Jul 1;52(4):1893-907.
27. Transition Research Programme. <http://research.ncl.ac.uk/transition/index.html> (accessed 13 December 2018).
28. Colver A, McConachie H, Le Couteur A et al . A longitudinal, observational study of the features of transitional healthcare associated with better outcomes for young people with long-term conditions. *BMC Med*. 2018 Jul 23;16(1):111.
29. Wenger, Etienne. Communities of practice: Learning, meaning, and identity. Cambridge University Press, 1999.
30. Sancu L, Coffey C, Patton G, et al. Sustainability of change with quality general practitioner education in adolescent health: a 5-year follow-up. *Med Educ*. 2005;39:557-60.
31. Shaw KL, Watanabe A, Rankin E, et al. Walking the talk. Implementation of transitional care guidance in a UK paediatric and a neighbouring adult facility. *Child Care Health Dev* 2014;40:663-70.
32. Renju J, Andrew B, Nyalali K, et al . A process evaluation of the scale up of a youth-friendly health services initiative in northern Tanzania. *Journal of the International AIDS Society*. 2010 Dec;13(1):32.

- 1  
2  
3 33. Geary RS, Gómez-Olivé FX, Kahn K, et al. Barriers to and facilitators of the provision of a  
4 youth-friendly health services programme in rural South Africa *BMC Health Serv Res*. 2014  
5 Jun 16;14:259.  
6  
7 34. Riley M, Patterson V, Lane JC, et al. The Adolescent Champion Model: Primary Care Becomes  
8 Adolescent-Centered via Targeted Quality Improvement. *J Pediatr*. 2018;193:229-36.  
9  
10 35. Transition Research Programme. Developmentally Appropriate Healthcare Toolkit. 2017.  
11 [https://www.northumbria.nhs.uk/quality-and-safety/clinical-trials/for-healthcare-](https://www.northumbria.nhs.uk/quality-and-safety/clinical-trials/for-healthcare-professionals/)  
12 [professionals/](https://www.northumbria.nhs.uk/quality-and-safety/clinical-trials/for-healthcare-professionals/) (accessed 13 Dec 2018)  
13  
14 36. McDonagh JE, Farre A, Gleeson H, et al. Making healthcare work for young people. *Arch Dis*  
15 *Child*. 2018 Jun;103(6):623.  
16  
17 37. Royal College of Physicians. Acute Care Toolkit 2015 [www.rcplondon.ac.uk/guidelines-](http://www.rcplondon.ac.uk/guidelines-policy/acute-care-toolkit-13-acute-care-adolescents-and-young-adults)  
18 [policy/acute-care-toolkit-13-acute-care-adolescents-and-young-adults](http://www.rcplondon.ac.uk/guidelines-policy/acute-care-toolkit-13-acute-care-adolescents-and-young-adults) (accessed 13 Dec  
19 2018).  
20  
21 38. Michaud PA, Schrier L, Ross-Russel R, et al. Paediatric departments need to improve  
22 residents' training in adolescent medicine and health: a position paper of the European  
23 Academy of Paediatrics. *Eur J Pediatr*. 2018 Apr;177(4):479-487.  
24  
25 39. Wright RJ, Howard EJ, Newbery N, Gleeson H. Training Gap. The present state of higher  
26 specialist training in adolescent and young adult health in medical specialties in the UK.  
27 *Future Healthcare Journal* 2017 Vol 4, No 2: 80–5  
28  
29 40. Kerem NC, Hardoff D. Adolescent health care education and training: insights from Israel. *Int*  
30 *J Adolesc Med Health*. 2016 Aug 1;28(3):303-7.  
31  
32 41. Jenkins RR. Adolescent medicine in the USA: a perspective on progress and lessons learnt.  
33 *Arch Dis Child*. 2016 Jun;101(6):510-513.  
34  
35  
36  
37  
38  
39  
40  
41  
42  
43  
44  
45  
46  
47  
48  
49  
50  
51  
52  
53  
54  
55  
56  
57  
58  
59  
60

1  
2  
3 **Table 1: The five dimensions of Developmentally appropriate healthcare (DAH)**  
4

5 **Dimensions of DAH for Young People** <sup>9-11</sup>  
6

7 **Biopsychosocial development and holistic care:** a focus on biopsychosocial development rather than  
8 chronological age, with routine biopsychosocial developmental assessment and approach to the young  
9 person adjusted accordingly  
10

11 **Acknowledgement of young people as a distinct group:** the recognition that their specific needs - in  
12 terms of informational resources, services, spaces, pathways and required competencies of staff - are  
13 distinctly different to those of younger children and older adults as a result of their developmental  
14 status.  
15

16 **Adjustment of care as the young person develops:** the need for flexibility to acknowledge the  
17 biopsychosocial developmental changes over time and the potential for regression in relapsing health  
18 conditions  
19

20 **Empowerment of the young person by embedding health education and health promotion:** that  
21 knowledge and skills training for young people is embedded into routine clinical practice to enable them  
22 to gradually become more autonomous with respect to the care of their own health as they grow up.  
23 Services need to be designed so as to nurture and support such skill development.  
24

25 **Interdisciplinary and Inter-organisational work:** a focus on continuity of care, coordination, consistency  
26 and communication across agencies. Connecting health, education, employment, social, voluntary  
27 agencies at a clinical and system level.  
28  
29  
30  
31

**Table 2 - Recruitment for the study by site, type of staff and method of data collection**

|                                                                          |                      | <b>District<br/>General<br/>Hospital</b> | <b>Paediatric<br/>Tertiary<br/>Hospital</b> | <b>Adult<br/>Tertiary<br/>Hospital</b> | <b>Total</b> |
|--------------------------------------------------------------------------|----------------------|------------------------------------------|---------------------------------------------|----------------------------------------|--------------|
| <b>Participants<br/>observed</b>                                         | Health professionals | 65                                       | 27                                          | 11                                     | 103          |
|                                                                          | Managers             | 57                                       | 0                                           | 15                                     | 72           |
|                                                                          | <b>Total</b>         | <b>122</b>                               | <b>27</b>                                   | <b>26</b>                              | <b>175</b>   |
| <b>Participants<br/>interviewed</b>                                      | Health professionals | 13                                       | 18                                          | 10                                     | 41           |
|                                                                          | Managers             | 13                                       | 6                                           | 5                                      | 24           |
|                                                                          | <b>Total</b>         | <b>26</b>                                | <b>24</b>                                   | <b>15</b>                              | <b>65</b>    |
| <b>Overall<br/>participants</b>                                          | Health professionals | 78                                       | 45                                          | 21                                     | 144          |
|                                                                          | Managers             | 70                                       | 6                                           | 20                                     | 96           |
|                                                                          | <b>Total</b>         | <b>148</b>                               | <b>51</b>                                   | <b>41</b>                              | <b>240</b>   |
| <b>Number of participants who were both<br/>interviewed and observed</b> |                      | <b>39</b>                                | <b>5</b>                                    | <b>4</b>                               | <b>48</b>    |
| <b>Total number of participants</b>                                      |                      | <b>109</b>                               | <b>46</b>                                   | <b>37</b>                              | <b>192</b>   |

**Table 3: The four constructs of Normalization Process Theory (NPT) mapped against practitioner groups**

| NPT Construct                                                                                 | Networks of young person-oriented practitioners and managers                                                                                                                                                                                           | Other practitioners and managers who work with young people                                                                                                                                                                                              |
|-----------------------------------------------------------------------------------------------|--------------------------------------------------------------------------------------------------------------------------------------------------------------------------------------------------------------------------------------------------------|----------------------------------------------------------------------------------------------------------------------------------------------------------------------------------------------------------------------------------------------------------|
| <b>Coherence:</b> Do people make sense of DAH?                                                | See how DAH extends and is related to other approaches to care of young people; relatively shared understanding of purpose of DAH; understanding of impact of DAH on their work; and see potential value and worth of DAH                              | Diverse views on relationship to other approaches; lack of shared understanding of purpose of DAH; diverse understanding of potential impact of DAH on their work; uncertainty around of potential value and worth (especially, given competing demands) |
| <b>Cognitive Participation:</b> Do people get involved with providing DAH and stay committed? | They are the key people driving DAH forward; they see DAH as legitimate, generally core, part of role; are very willing to work with others to enable DAH; and motivated to deliver DAH over time                                                      | Aware that key people are driving DAH forward (key young person-orientated practitioners); lack of agreement that DAH legitimate part of work; some are willing to work with others to enable DAH; some are motivated to deliver over time               |
| <b>Collective Action:</b> Do people make DAH work in practice?                                | DAH is operationalisable, especially within network; trust people in network to enact DAH, but less trust beyond; right mix of skills and training to undertake DAH in network, again, less beyond; in one site, clear support for DAH in organisation | Diverse views on workability of DAH and on trust about whether the right people are enacting DAH; lack of skills to undertake DAH, with training offered a one site; in one site, clear support for DAH in organisation                                  |
| <b>Reflexive Monitoring:</b> Do people evaluate DAH as worthwhile?                            | Aware of impact of DAH; assess DAH as worthwhile and individually assess DAH as working well; enact DAH flexibly                                                                                                                                       | Unsure of impact of DAH; unsure of whether worthwhile (given competing demands) or working well in practice; may enact some elements of DAH flexibly                                                                                                     |

## Standards for Reporting Qualitative Research (SRQR)\*

<http://www.equator-network.org/reporting-guidelines/srqr/>

Page/line no(s).

### Title and abstract

|                                                                                                                                                                                                                                                              |        |
|--------------------------------------------------------------------------------------------------------------------------------------------------------------------------------------------------------------------------------------------------------------|--------|
| <p><b>Title</b> - Concise description of the nature and topic of the study Identifying the study as qualitative or indicating the approach (e.g., ethnography, grounded theory) or data collection methods (e.g., interview, focus group) is recommended</p> | Page 1 |
| <p><b>Abstract</b> - Summary of key elements of the study using the abstract format of the intended publication; typically includes background, purpose, methods, results, and conclusions</p>                                                               | Page 1 |

### Introduction

|                                                                                                                                                                     |        |
|---------------------------------------------------------------------------------------------------------------------------------------------------------------------|--------|
| <p><b>Problem formulation</b> - Description and significance of the problem/phenomenon studied; review of relevant theory and empirical work; problem statement</p> | Page 4 |
| <p><b>Purpose or research question</b> - Purpose of the study and specific objectives or questions</p>                                                              | Page 4 |

### Methods

|                                                                                                                                                                                                                                                                                                                                                                                                             |        |
|-------------------------------------------------------------------------------------------------------------------------------------------------------------------------------------------------------------------------------------------------------------------------------------------------------------------------------------------------------------------------------------------------------------|--------|
| <p><b>Qualitative approach and research paradigm</b> - Qualitative approach (e.g., ethnography, grounded theory, case study, phenomenology, narrative research) and guiding theory if appropriate; identifying the research paradigm (e.g., postpositivist, constructivist/ interpretivist) is also recommended; rationale**</p>                                                                            | Page 5 |
| <p><b>Researcher characteristics and reflexivity</b> - Researchers' characteristics that may influence the research, including personal attributes, qualifications/experience, relationship with participants, assumptions, and/or presuppositions; potential or actual interaction between researchers' characteristics and the research questions, approach, methods, results, and/or transferability</p> | Page 5 |
| <p><b>Context</b> - Setting/site and salient contextual factors; rationale**</p>                                                                                                                                                                                                                                                                                                                            | Page 5 |
| <p><b>Sampling strategy</b> - How and why research participants, documents, or events were selected; criteria for deciding when no further sampling was necessary (e.g., sampling saturation); rationale**</p>                                                                                                                                                                                              | Page 5 |
| <p><b>Ethical issues pertaining to human subjects</b> - Documentation of approval by an appropriate ethics review board and participant consent, or explanation for lack thereof; other confidentiality and data security issues</p>                                                                                                                                                                        | Page 5 |
| <p><b>Data collection methods</b> - Types of data collected; details of data collection procedures including (as appropriate) start and stop dates of data collection and analysis, iterative process, triangulation of sources/methods, and modification of procedures in response to evolving study findings; rationale**</p>                                                                             | Page 5 |



|    |                                                                                         |                 |
|----|-----------------------------------------------------------------------------------------|-----------------|
| 1  |                                                                                         |                 |
| 2  |                                                                                         |                 |
| 3  | <b>Data collection instruments and technologies</b> - Description of instruments (e.g., |                 |
| 4  | interview guides, questionnaires) and devices (e.g., audio recorders) used for data     |                 |
| 5  | collection; if/how the instrument(s) changed over the course of the study               | Page 5          |
| 6  |                                                                                         |                 |
| 7  | <b>Units of study</b> - Number and relevant characteristics of participants, documents, |                 |
| 8  | or events included in the study; level of participation (could be reported in results)  | Page 6, Table 1 |
| 9  |                                                                                         |                 |
| 10 | <b>Data processing</b> - Methods for processing data prior to and during analysis,      |                 |
| 11 | including transcription, data entry, data management and security, verification of      |                 |
| 12 | data integrity, data coding, and anonymization/de-identification of excerpts            | Page 6          |
| 13 |                                                                                         |                 |
| 14 | <b>Data analysis</b> - Process by which inferences, themes, etc., were identified and   |                 |
| 15 | developed, including the researchers involved in data analysis; usually references a    |                 |
| 16 | specific paradigm or approach; rationale**                                              | Page 6          |
| 17 |                                                                                         |                 |
| 18 | <b>Techniques to enhance trustworthiness</b> - Techniques to enhance trustworthiness    |                 |
| 19 | and credibility of data analysis (e.g., member checking, audit trail, triangulation);   |                 |
| 20 | rationale**                                                                             | Page 6          |

## Results/findings

|    |                                                                                             |           |
|----|---------------------------------------------------------------------------------------------|-----------|
| 23 | <b>Synthesis and interpretation</b> - Main findings (e.g., interpretations, inferences, and |           |
| 24 | themes); might include development of a theory or model, or integration with                |           |
| 25 | prior research or theory                                                                    | Page 6-12 |
| 26 |                                                                                             |           |
| 27 | <b>Links to empirical data</b> - Evidence (e.g., quotes, field notes, text excerpts,        |           |
| 28 | photographs) to substantiate analytic findings                                              | Page 6-12 |
| 29 |                                                                                             |           |

## Discussion

|    |                                                                                           |            |
|----|-------------------------------------------------------------------------------------------|------------|
| 32 | <b>Integration with prior work, implications, transferability, and contribution(s) to</b> |            |
| 33 | <b>the field</b> - Short summary of main findings; explanation of how findings and        |            |
| 34 | conclusions connect to, support, elaborate on, or challenge conclusions of earlier        |            |
| 35 | scholarship; discussion of scope of application/generalizability; identification of       |            |
| 36 | unique contribution(s) to scholarship in a discipline or field                            | Page 12-14 |
| 37 |                                                                                           |            |
| 38 | <b>Limitations</b> - Trustworthiness and limitations of findings                          | Page 13    |
| 39 |                                                                                           |            |

## Other

|    |                                                                                            |        |
|----|--------------------------------------------------------------------------------------------|--------|
| 42 | <b>Conflicts of interest</b> - Potential sources of influence or perceived influence on    |        |
| 43 | study conduct and conclusions; how these were managed                                      | Page 3 |
| 44 |                                                                                            |        |
| 45 | <b>Funding</b> - Sources of funding and other support; role of funders in data collection, |        |
| 46 | interpretation, and reporting                                                              | Page 3 |
| 47 |                                                                                            |        |

\*The authors created the SRQR by searching the literature to identify guidelines, reporting standards, and critical appraisal criteria for qualitative research; reviewing the reference lists of retrieved sources; and contacting experts to gain feedback. The SRQR aims to improve the transparency of all aspects of qualitative research by providing clear standards for reporting qualitative research.

1  
2  
3  
4  
5  
6  
7  
8  
9  
10  
11  
12  
13  
14  
15  
16  
17  
18  
19  
20  
21  
22  
23  
24  
25  
26  
27  
28  
29  
30  
31  
32  
33  
34  
35  
36  
37  
38  
39  
40  
41  
42  
43  
44  
45  
46  
47  
48  
49  
50  
51  
52  
53  
54  
55  
56  
57  
58  
59  
60

\*\*The rationale should briefly discuss the justification for choosing that theory, approach, method, or technique rather than other options available, the assumptions and limitations implicit in those choices, and how those choices influence study conclusions and transferability. As appropriate, the rationale for several items might be discussed together.

**Reference:**

O'Brien BC, Harris IB, Beckman TJ, Reed DA, Cook DA. **Standards for reporting qualitative research: a synthesis of recommendations.** *Academic Medicine*, Vol. 89, No. 9 / Sept 2014  
DOI: 10.1097/ACM.0000000000000388

For peer review only

# BMJ Open

## Can we normalize developmentally appropriate health care for young people in UK hospital settings? An ethnographic study

|                                 |                                                                                                                                                                                                                                                                                                                                                                                                                                                                                                                                                                                                                                                                                                                                            |
|---------------------------------|--------------------------------------------------------------------------------------------------------------------------------------------------------------------------------------------------------------------------------------------------------------------------------------------------------------------------------------------------------------------------------------------------------------------------------------------------------------------------------------------------------------------------------------------------------------------------------------------------------------------------------------------------------------------------------------------------------------------------------------------|
| Journal:                        | <i>BMJ Open</i>                                                                                                                                                                                                                                                                                                                                                                                                                                                                                                                                                                                                                                                                                                                            |
| Manuscript ID                   | bmjopen-2019-029107.R1                                                                                                                                                                                                                                                                                                                                                                                                                                                                                                                                                                                                                                                                                                                     |
| Article Type:                   | Research                                                                                                                                                                                                                                                                                                                                                                                                                                                                                                                                                                                                                                                                                                                                   |
| Date Submitted by the Author:   | 02-Apr-2019                                                                                                                                                                                                                                                                                                                                                                                                                                                                                                                                                                                                                                                                                                                                |
| Complete List of Authors:       | Rapley, Tim; Northumbria University Department of Social Work and Communities, Social Work, Education and Community Wellbeing; Newcastle University, Institute of Health and Society<br>Farre, Albert; University of Dundee, School of Nursing and Health Sciences<br>Parr, Jeremy; Newcastle University, UK, Institute of Neuroscience<br>Wood, Victoria; University College London, Department of Applied Health Research<br>Reape, Debbie; Northumbria Healthcare NHS Foundation Trust<br>Dovey-Pearce, Gail; Northumbria Healthcare NHS Foundation Trust<br>McDonagh, Janet; University of Manchester, Arthritis Research UK Centre for Epidemiology, Centre for Musculoskeletal Research ; Manchester University NHS Foundation Trust |
| <b>Primary Subject Heading</b>: | Health services research                                                                                                                                                                                                                                                                                                                                                                                                                                                                                                                                                                                                                                                                                                                   |
| Secondary Subject Heading:      | Qualitative research                                                                                                                                                                                                                                                                                                                                                                                                                                                                                                                                                                                                                                                                                                                       |
| Keywords:                       | Adolescent Medicine, Adolescent Health Services, Developmentally Appropriate Healthcare, QUALITATIVE RESEARCH, Young Adults                                                                                                                                                                                                                                                                                                                                                                                                                                                                                                                                                                                                                |
|                                 |                                                                                                                                                                                                                                                                                                                                                                                                                                                                                                                                                                                                                                                                                                                                            |

SCHOLARONE™  
Manuscripts

# Can we normalize developmentally appropriate health care for young people in UK hospital settings? An ethnographic study

Tim Rapley M.A., Ph.D. <sup>a,b \*</sup>, Albert Farre Ph.D.<sup>c</sup> Jeremy R Parr M.B.Ch.B., M.D. <sup>d</sup>, Victoria Wood Ph.D. <sup>e</sup>, Debbie Reape M.B.A. <sup>f</sup>, Gail Dovey-Pearce D.Clin.Psych. <sup>f</sup>, Janet E McDonagh M.B.B.S. M.D. <sup>g,h,i</sup>.

<sup>a</sup> Institute of Health and Society, Newcastle University, Newcastle upon Tyne, UK

<sup>b</sup> Department of Social Work, Education and Community Wellbeing, Northumbria University, Newcastle upon Tyne, UK

<sup>c</sup> School of Nursing and Health Sciences, Dundee, UK

<sup>d</sup> Institute of Neuroscience, Newcastle University, Newcastle upon Tyne, UK

<sup>e</sup> Department of Applied Health Research, University College London, London, UK

<sup>f</sup> Northumbria Healthcare NHS Foundation Trust, Tyne and Wear, UK

<sup>g</sup> Arthritis Research UK Centre for Epidemiology, Centre for Musculoskeletal Research, University of Manchester, Manchester, UK

<sup>h</sup> NIHR Manchester Biomedical Research Centre, Manchester University NHS Foundation Trust, Manchester, UK

<sup>i</sup> Manchester Academic Health Science Centre, Manchester, UK

\*Address correspondence to: Tim Rapley, M.A., Ph.D., Department of Social Work, Education and Community Wellbeing, Northumbria University, Coach Lane Campus West, Newcastle, UK, NE7 7XA. Phone: 0191 215 6136; Fax: None; Email: [tim.rapley@northumbria.ac.uk](mailto:tim.rapley@northumbria.ac.uk).

**Word Count:** 4806 excluding tables

**Key Words:** Adolescent Medicine; Adolescent Health Services; Developmentally Appropriate Healthcare; Qualitative Research; Young Adults.

## ABSTRACT

**Objective** The World Health Organisation has argued that adolescent-responsive health systems are required. Developmentally appropriate healthcare (DAH) for young people is one approach that could underpin this move. The aim of this study was to explore the potential for DAH to become normalized, to become a routine, taken-for-granted, element of clinical practice.

**Design** Qualitative ethnographic study. Analyses were based on procedures from first-generation grounded theory and theoretically informed by normalization process theory.

**Setting** Two tertiary and one secondary care hospital in England.

**Participants** 192 participants, health professionals (n=121) and managers (n= 71) were recruited between June 2013-January 2015. Approximately 1600 hours of non-participant observations in clinics, wards and meeting rooms were conducted, alongside 65 formal qualitative interviews.

**Results** We observed diverse values and commitments towards the care of young people and provision of DAH, including a distributed network of young person-orientated practitioners. Informal networks of trust existed, where specific people, teams or wards were understood to have the right skill-mix, or mind-set, or access to resources, to work effectively with young people. As young people move through an organisation, the preference is to direct them to other young person-orientated practitioners, so inequities in skills and experience can be self-sustaining. At two sites, initiatives around adolescent and young adult training remained mostly within these informal networks of trust. At another, through support by wider management, we observed a programme that sought to make the young people's healthcare visible across the organization, and to get people to reappraise values and commitment.

**Conclusion** To move towards normalization of DAH within an organisation, we cannot solely rely on informal networks and cultures of young person-orientated training, practice and mutual referral and support. Organisation-wide strategies and training are needed, to enable better integration and consistency of health services for all young people.

**Strengths and limitations of this study**

- This is the first ethnographic study addressing the provision of developmentally appropriate health care for young people.
- Exploring the provision of health care for young people over time, within specific teams and specialities, as well as across an organisation, enabled us to explore the diversity of ways that health care for young people is currently delivered within and across professionals, teams, wards and organisations.
- We only focused on three different organisations and all these organisations had a reputation for undertaking research on the care young people, so may represent examples of 'good practice'.

1  
2  
3  
4  
5 **Funding Statement:** This article presents independent research funded by the National Institute for  
6 Health Research (NIHR) under the Programme Grants for Applied Research programme: RP-PG-  
7 0610-10112. The views expressed in this article are those of the authors and not necessarily those of  
8 the NHS, the NIHR or the Department of Health. The funder took no part in the collection, analysis or  
9 interpretation of the data, in the writing of the article nor in the decision to submit the article for  
10 publication.  
11  
12  
13  
14

15  
16 **Competing interests:** All authors have completed the ICMJE uniform disclosure form and declare  
17 they have no financial relationships from any organisation that might have an interest in the  
18 submitted work in the previous three years; and no other relationships or activities that could  
19 appear to have influenced the submitted work.  
20  
21  
22

23 **Sponsor:** The study sponsor, Northumbria Healthcare NHS Foundation Trust, had no role in the study  
24 design, in the collection, analysis, and interpretation of data, in the writing of the report, or in the  
25 decision to submit the article for publication. VW had an honorary contract with Northumbria  
26 Healthcare, and GD-P and DR were employed by Northumbria Healthcare.  
27  
28  
29  
30

31  
32 **Author Contributions:** TR, JMCD, JP and DR designed the original study. VW and AF carried out data  
33 collection and data analysis under the supervision of TR, JMCD, DR, GD-P and JP. TR and AF led on  
34 the writing of this manuscript. All authors worked on drafts of the paper and approved the final  
35 version of this article.  
36  
37  
38

39 **Acknowledgements:** We acknowledge the support of Dr Elizabeth Rankin for her support and the  
40 health professionals and staff at the 3 participating hospitals. We also thank all the members of the  
41 youth advisory group – UP – for their support and advice. \*\*The Transition Collaborative Group  
42 consists of: the authors of this paper; other co-applicants: Allan Colver, Helen McConachie, Mark S  
43 Pearce, Luke Vale, Caroline Bennett, Greg Maniatopoulos; advisors: Nichola Chater, Helena Gleeson.  
44  
45  
46  
47  
48

49 **Data availability statement:** No additional data is available. Data are difficult to anonymise and we  
50 had not sought permission for data sharing.  
51  
52  
53

54 **Supplementary Files:** Original Protocol; Standards for Reporting Qualitative Research (SRQR)  
55 Checklist.  
56  
57  
58  
59  
60

## INTRODUCTION

The health of young people, defined by the World Health Organisation as any person between ages 10 and 24 years,[1] is a neglected yet pressing global issue [2] affecting the largest generation in history.[3] Youth-friendly healthcare [4], promoted as a means to improve health services for young people, has underpinned quality of care and policy frameworks.[5-7] However, as highlighted by the WHO, there is the need to move from the ad hoc provision of youth-friendly healthcare services – often embedded in specific locations or teams - to adolescent-responsive healthcare systems [8]. All the aspects of health and social care that young people engage with, the range of providers, organisations and policies, need to more responsive to and aligned with the care of young people. Other work has also noted that health system-level strategies are needed to further develop and improve healthcare for young people [9,10]. Healthcare providers need to respond to young people's changing developmental needs in a manner that is consistent, universal and provided across healthcare settings. Such adolescent-responsive health systems should be flexible, and should focus on a broad range of aspects of healthcare provision, from the frontline (such as how healthcare professionals communicate with young people) through to the higher levels of healthcare provision (such as how services are planned and commissioned).

Developmentally appropriate healthcare (DAH) for young people [11-13] is one concept that could underpin an adolescent-responsive healthcare system (See Table 1).

**Table 1: The five dimensions of Developmentally appropriate healthcare (DAH)**

---

### Dimensions of DAH for Young People <sup>9-11</sup>

---

**Biopsychosocial development and holistic care:** a focus on biopsychosocial development rather than chronological age, with routine biopsychosocial developmental assessment and approach to the young person adjusted accordingly

**Acknowledgement of young people as a distinct group:** the recognition that their specific needs - in terms of informational resources, services, spaces, pathways and required competencies of staff - are distinctly different to those of younger children and older adults as a result of their developmental status.

**Adjustment of care as the young person develops:** the need for flexibility to acknowledge the biopsychosocial developmental changes over time and the potential for regression in relapsing health conditions

**Empowerment of the young person by embedding health education and health promotion:** that knowledge and skills training for young people is embedded into routine clinical practice to enable them to gradually become more autonomous with respect to the care of their own health as they grow up. Services need to be designed so as to nurture and support such skill development.

**Interdisciplinary and Inter-organisational work:** a focus on continuity of care, coordination, consistency

---



1  
2  
3 and communication across agencies. Connecting health, education, employment, social, voluntary  
4 agencies at a clinical and system level.  
5

---

6  
7  
8  
9  
10 In contrast to the more service-focussed nature of the youth friendly health service [14], DAH  
11 addresses the clinical approach to individual young people and specifically recognises the changing  
12 developmental needs of young people and the role of healthcare in addressing and supporting  
13 young people. DAH focuses on biopsychosocial development rather than chronological age.  
14  
15 Chronological age is recognised to be a poor indicator of developmental status particularly in the  
16 context of a long-term health condition [15]. Young people make this journey to adulthood in their  
17 own way; young people's development does not have a fixed period attached to it. Many  
18 developmental milestones are met after reaching the legal age of adulthood [16,17 ].  
19

20  
21  
22 Services underpinned by DAH have been reported nationally and internationally as a potential key  
23 mechanism to improve health outcomes for young people.[3,18] Increasing knowledge about the  
24 development of young people [19,20] offers unprecedented opportunities for service improvement.  
25 In the context of sub-optimal provision of healthcare for young people,[3,8] DAH offers the potential  
26 to transform traditional models of healthcare delivery into adolescent-responsive healthcare  
27 systems. However, the concept of DAH has been operationalized in a range of ways in the medical  
28 literature [11] and is understood in different ways by clinicians and managers in the NHS [12]. In this  
29 study, theoretically informed by Normalization Process Theory (NPT)[21], we investigated the  
30 potential for normalization of DAH within three UK hospitals. NPT identifies, characterises, and  
31 explains aspects of individual and collective behaviour shown to be important in empirical studies of  
32 the introduction, embedding and integration of change [21]. Normalization is achieved when a  
33 technique, technology or organisational change becomes a routine and taken-for-granted element  
34 of clinical practice.  
35  
36  
37  
38  
39  
40  
41  
42  
43  
44  
45  
46  
47

## 48 **METHODS**

49  
50  
51 This ethnographic study was conducted across three hospitals in two regions of England (a district  
52 general hospital, a large paediatric tertiary hospital and a large adult tertiary hospital) all in urban  
53 settings outside London. All hospitals had a history of championing research and innovative service  
54 provision for young people. At the start of the fieldwork one site – the General Hospital - was  
55 developing a policy about DAH. This had emerged from a formal, organisationally-supported, group  
56 that focused on the care of young people, that was initially formed to focus on transition. This  
57  
58  
59  
60

strategy group comprised of managers and senior clinicians. At another site - the Paediatric Hospital - there was no explicit policy on DAH, but one focused on transition. They also had a formal, organisationally-supported, group focused on young people. However, thinking about DAH was being driven by enthusiasts alone. Finally, the third site had no policy on DAH, transition or young people. The sole organisation-wide initiative is an informal interest group focused on young people issues. Health professionals, recruited through six medical and surgical specialties (Diabetes, Emergency Care, General Paediatrics, Outpatients, Rheumatology, and Trauma and Orthopaedics), were chosen to represent the heterogeneous services found in UK National Health Service (NHS) hospitals. Managers were recruited at each site when their roles were relevant to the provision of services for young people in paediatrics and/or adult care. The study received a favourable opinion from the National Research Ethics Committee (12/NE/0423).

Data collection took place over three phases, between June 2013 and January 2015. Recruitment was initially mediated through gatekeepers. Participants were purposively sampled, initially through maximum variation sampling and then refined through snowball and theoretical sampling. [22] Participants were approached to take part in the study using a variety of methods including face-to-face, telephone and email. A total of 192 participants (professionals and managers) were recruited (Table 2).

**Table 2 - Recruitment for the study by site, type of staff and method of data collection**

|                                                      |                      | <b>District<br/>General<br/>Hospital</b> | <b>Paediatric<br/>Tertiary<br/>Hospital</b> | <b>Adult<br/>Tertiary<br/>Hospital</b> | <b>Total</b> |
|------------------------------------------------------|----------------------|------------------------------------------|---------------------------------------------|----------------------------------------|--------------|
| <b>Participants<br/>observed only</b>                | Health professionals | 53                                       | 22                                          | 10                                     | 85           |
|                                                      | Managers             | 43                                       | 0                                           | 12                                     | 55           |
|                                                      | <b>Total</b>         | <b>96</b>                                | <b>22</b>                                   | <b>22</b>                              | <b>140</b>   |
| <b>Participants<br/>interviewed<br/>only</b>         | Health professionals | 0                                        | 14                                          | 9                                      | 23           |
|                                                      | Managers             | 0                                        | 5                                           | 2                                      | 7            |
|                                                      | <b>Total</b>         | <b>0</b>                                 | <b>19</b>                                   | <b>11</b>                              | <b>30</b>    |
| <b>Participants<br/>interviewed<br/>and observed</b> | Health professionals | 8*                                       | 4                                           | 1                                      | 13           |
|                                                      | Managers             | 5*                                       | 1                                           | 3                                      | 9            |
|                                                      | <b>Total</b>         | <b>13</b>                                | <b>5</b>                                    | <b>4</b>                               | <b>22</b>    |

|                                     |            |           |           |            |
|-------------------------------------|------------|-----------|-----------|------------|
| <b>Total number of participants</b> | <b>109</b> | <b>46</b> | <b>37</b> | <b>192</b> |
|-------------------------------------|------------|-----------|-----------|------------|

\*Participants interviewed twice

Approximately 1600 hours of non-participant observations were conducted by two researchers, (AF, VW) alongside 65 formal qualitative interviews. Researchers had specific training and extensive experience in conducting qualitative research and had no relationship with the participants. Observations were conducted within and across a wide variety of hospital spaces – including clinics, wards and meeting rooms - depending on the nature of the session and/or the professionals involved. They were recorded in contemporaneous fieldnotes. Formal interviews (average length, 45 minutes) were conducted face-to-face on a one-to-one basis and were audio-recorded, transcribed, edited to ensure respondents anonymity and then analysed alongside anonymised fieldnotes. Initial topic guides were designed for clinicians and managers irrespective of setting and evolved during the course of data collection, allowing for tailoring and gradual integration of a variety of follow-up issues and topics of relevance to specific roles, settings, specialities or areas. Observation and interviews focused on the organisation of services for young people, including (intra-/inter-) organisational, team and individual aspects of provision, training and support, and patient involvement as well as emerging topics identified through concurrent data analysis.

All analysis was conducted according to the standard procedures of rigorous qualitative analysis by AF, VW and TR.[23] We used procedures from first-generation grounded theory - coding, constant comparison, memoing [24] - and from analytic induction, deviant case analysis.[25] Sampling, data collection and analysis occurred concurrently, so that issues raised in earlier phases of fieldwork were explored subsequently to enable conceptual saturation [26]. We undertook independent coding and cross checking, team data sessions and member validation with some of the participants in the fieldwork. The analysis was assisted by QSR NVivo 10 software and theoretically-informed by Normalization Process Theory[21]. In presenting the analysis, we have drawn on interview quotes, over excerpts from fieldnotes, as they offer the reader rapid access to the key analytic ideas.

### **Patient and Public Involvement**

This study was part of a larger longitudinal programme of research focused on the commissioning and provision of healthcare services for young people [27,28]. The research questions for the programme were initially informed by engagements with a pre-existing young people's advisory group, third-sector voluntary agencies and pupils from a school for young people with physical impairments and students from a living skills course at a college. A young people's advisory group

1  
2 was established as part of programme and supported all studies within the programme. The group  
3 advised on practical (e.g. recruitment) and conceptual issues (e.g. design of study, discussion of key  
4 findings and concepts) for this specific study. Young people led on aspects of dissemination,  
5 including the production of a video about DAH, for this study.  
6  
7  
8  
9

## 11 RESULTS

12  
13  
14 We identified diverse values and commitments towards the care of young people and provision of  
15 DAH across organisations, specialities and staff. We observed a range of informal cultures of good  
16 practice implementing core elements of DAH, alongside formal and informal cultures of training  
17 around DAH and the provision of care of young people.  
18  
19

### 21 Diverse values and commitments

22  
23  
24 When discussing the provision of care for young people, many focused on the need to create a more  
25 age appropriate environment, in terms of physical space, the visual and material culture of waiting  
26 room and wards. Others, especially those who worked regularly with young people, discussed  
27 features such as appropriate communication, confidentiality and a more holistic focus. As one  
28 manager noted:  
29  
30  
31

32  
33 The young people have told us that, um, we need, they're not bothered about where they  
34 are seen so, as in, what the building's look like or what the clinic room looks like. They want  
35 to make sure that they see somebody who's interested and who knows what their disease is  
36 like, but also has an awareness of all the other stuff that's going on when they're 16 to 18  
37  
38  
39 (Manager, General Hospital)  
40  
41

42 At this hospital, involvement was considered to be part of patient experience, and young people  
43 were involved in such activities as the, attendance at governance meetings and training of staff.  
44 Young people's experiences were an important influence on this manager's understanding of  
45 'appropriate' service provision.  
46  
47  
48

49  
50 There were conflicting views on the value and worth of enacting DAH across the organisations. The  
51 numbers of young people accessing health services were often portrayed as small, so in  
52 organisational terms they were 'just below the radar'. In contrast to older, especially elderly  
53 patients, they were also seen as 'very rarely unwell'. This led some to question whether  
54 professionals should be adjusting their practices or offering distinct, tailored, services, as there are  
55 always competing demands for resources, time and expertise.  
56  
57  
58  
59  
60

1  
2  
3  
4  
5  
6  
7  
8  
9  
10  
11  
12  
13  
14  
15  
16  
17  
18  
19  
20  
21  
22  
23  
24  
25  
26  
27  
28  
29  
30  
31  
32  
33  
34  
35  
36  
37  
38  
39  
40  
41  
42  
43  
44  
45  
46  
47  
48  
49  
50  
51  
52  
53  
54  
55  
56  
57  
58  
59  
60

It's small enough [numbers] that if you don't, if you don't buy into it, there's plenty to be getting on with the other 90%. And everybody's jobs are so frantic that you could easily do a very good job with that 90% who are 25, 26 plus. ... So, you could actually ignore these young people completely. (Manager, Adult Hospital)

Questions of legitimacy and buy-in, or rather, enrolment, are central to individual, team and organisational change. In part, this lack of capacity and willingness seems to be compounded by the liminal status of young people within the organisational and professional culture of the UK healthcare system:

Adults don't really want them because they are too young and the paediatricians don't really want them because they are too old (Health Professional, General Hospital).

With the exception of charity-supported oncology wards, adolescent only wards, or spaces within wards, were rare and were often subject to dissolution if there were competing demands. None of the sites had a senior clinical or management lead with responsibility for young people's service development.

However, across all the sites we did observe a complex network of young person-orientated practitioners, people acting as young people 'enthusiasts', or 'champions', within specific clinical or management teams in either a formal or informal capacity. Some specific services and practices were organised around the care of young people. However, relying on the enthusiasm and willingness of specific individuals can become problematic.

Several people have left, who have been very senior members and very adolescent minded and have been replaced by either rotational posts or part-time posts, so that continuity within our team and the wealth of expertise has been impacted on significantly. (Health Professional, Paediatric Hospital).

A focus on champions raises key questions about the sustainability of services for young people over time.

### **Informal cultures of good practice**

Across all three hospitals, we observed local cultures – in teams, clinics, wards and meetings – where professionals attempted to enact a philosophy of care towards young people. They were driven by an awareness of how approaching young people in a different way can mean that young people 'might take the right messages away, might not end up neglecting their health needs, damaging

1  
2 themselves' (Manager, General Hospital). For these professionals, working with young people  
3 required a specific mind-set and skill-set.  
4  
5

6  
7 At its simplest level this often involved the ability of the professional, or the multi-disciplinary team,  
8 to communicate effectively, listening to young people about their health needs and asking them  
9 questions, about their broader psychosocial situation. Care is contextualised by gathering  
10 information about a young person's life, including educational, vocational, social, friendship and  
11 family issues; and exploring risk and resilience factors. Such information is used by teams to  
12 generate an appropriate context for effective communication, inform interventions and to organise  
13 consultations, including offering appropriate health education and support for self-management.  
14  
15  
16  
17  
18

19 Providing an appropriate service for young people is often a deeply rooted value for these  
20 individuals and groups. The 'You're Welcome Quality Criteria' [6] were generally well known,  
21 including core issues such confidentiality and consent, joined-up working, transition and  
22 accessibility. Within the context of adult care, failure to attend appointments was a prevalent issue.  
23 Ways of dealing with this varied and we were told about what was referred to as, 'a softer approach  
24 to the DNAs (did not attend)'  
25  
26  
27  
28  
29

30 The organisation ruling of one strike and you're out, we don't adhere to, so we will give  
31 them multiple attempts to come into clinic ... we don't actually put them as a DNA, because  
32 they just booked in [the consultants] calendar but we don't actually book it on the system so  
33 they don't officially come as a DNA ... So I'll make informal appointments with the young  
34 people and then, when they arrive we book them into clinic, so that way they don't DNA  
35  
36  
37  
38  
39 (Health Professional, Adult Hospital).  
40

41 Working creatively within the existing norms, rules and resources was characteristic of those who  
42 believed that young people needed to be recognized as a group with specific needs and approaches.  
43  
44

45 We observed across all the organisations 'lots of great pockets of work' as some specialties, teams,  
46 people or spaces offered very strong young person-orientated care. However, not all people or  
47 services felt it relevant to make 'special arrangements', but chose instead to treat young people like  
48 'an ordinary patient'. Alongside this, the uneven distribution of resources within and across  
49 specialties created inequities of care.  
50  
51  
52  
53

54 There are ... areas in the hospital who, because they have more funding or they're funded in  
55 a different way, they might have a youth worker because it's part of their team and just for  
56 their team. They might have a psychologist who is just part of their team. ... it very much  
57  
58  
59  
60

1  
2 depends on what speciality you're unfortunate to fall into, depending on what illness you've  
3 got as to what service you then get. ... (Health Professional, Paediatric Hospital)  
4  
5

6  
7 However, resources were not the only source of inequities. In part the inequities in skills and  
8 experience across the organisations seemed to be self-sustaining within organisations. Those with  
9 an interest, the 'enthusiasts', were embedded in an informal network of care.  
10  
11

12 we've now got a group of interested people across the [organisation]. So if a young person  
13 comes to me and they've got a, a joint problem, but they've also got a bowel problem, I  
14 know which bowel consultant and which bowel nurse will be the most appropriate to send  
15 them to. ... Um, so we've got a good group of people across the [organisation] that we can  
16 actually send these youngsters to who've got more awareness of the issues that they could  
17 have (Health Professional, General Hospital)  
18  
19  
20  
21  
22

23 An informal knowledge economy of young person-orientated practitioners and practices existed  
24 within the organisations. These were networks of trust. These referrals helped to create, sustain  
25 and reinforce the network over time. This practice also existed across organisations, especially in  
26 terms of the transfer of young people to adult services. Young person-orientated practitioners  
27 referred to other young person-orientated practitioners – in this way, they worked to actively avoid  
28 referring young people to those they felt maybe less young person-orientated. These people then  
29 gained less practical experience with managing these patients, and so had less chance to reappraise  
30 their values and commitment to working with young people in new ways, as well as to develop the  
31 right skill-mix.  
32  
33  
34  
35  
36  
37  
38

39 An informal network also existed in terms of spaces. At each site, at least one specific ward was  
40 known to offer more young person-orientated care. They were seen as repositories of knowledge  
41 and skills, able to advise on or manage potentially challenging behaviour.  
42  
43  
44

45 We were getting so much enquiries regarding adolescents from the other wards, even just  
46 for the basics. ... So, they would ring us and say, "We can't get them out of bed in the  
47 morning". You know, "they just want to stay in bed all the time and they don't want to  
48 interact with anything". So we would say, "Well then you have to be stern, you know, you  
49 have to tell them, 'This is the plan,' you have to do a contract with them and agree with  
50 them that if they get over this time, then they can do this at this time" (Health Professional,  
51 Paediatric Hospital).  
52  
53  
54  
55  
56  
57  
58  
59  
60

1  
2  
3 It is not only that 'just different wards have a different tolerance', but rather that different wards  
4 and teams, developed, over time, different understanding and a different sense of what was  
5 legitimate work, as well as developmentally appropriate skills, competencies and routines.  
6  
7

8  
9 In some situations, we've had patients on our general wards where the parent has wanted  
10 to stay. And we, my nurses, would find that very strange. But actually, in oncology, that  
11 would not be strange at all. Because ... [they] would be used to that, even a patient could be  
12 22, 23 and still may want their mum. But they're not exposed to that in the main wards.  
13  
14 (Health Professional, Adult Hospital)  
15  
16

17  
18 Exposure to working with young people was central to adjusting expectations, enabling them to  
19 longer see young people as having 'strange' requests or being particularly 'difficult' to work with.  
20  
21 Exposure offered a chance to develop new skills.  
22

### 23 **(In)formal cultures of training**

24  
25  
26 Within each of the organisations there were formal and informal groups at which the young person-  
27 orientated enthusiasts met and supported each other collectively. Essentially, these groups were a  
28 collective effort to promote initiatives to raise awareness across the organisations, create change,  
29 offer support and, importantly, learn from each other outwith their team, area or specialty.  
30  
31  
32

33  
34 I have nothing in writing in my job plan that says I specialise in young people. ... Nobody said,  
35 "If you want to be a young adult person, you need to go on this [training course]". It's just  
36 something that I became aware of through organisations or talking to people. So, it's all  
37 quite ad-hoc rather than really, really planned. And it's just really by hearsay and talking to  
38 people and networking throughout [this organisation] over many years. (Health Professional,  
39 Paediatric Hospital)  
40  
41  
42  
43

44  
45 Without any formalised professional routes available, the local, regional and national special  
46 interests groups became a central resource for supporting adolescent and young adult health  
47 training across the organisations.  
48  
49

50  
51 At two hospitals, the only initiatives involving training around young people originated from their  
52 respective special interest groups, in the form of annual study days. At one of these hospitals, there  
53 was a policy initiative explicitly around transition, yet no specific training had been organised. At the  
54 other, development of a formal policy was said to be 'not a priority for the organisation'.  
55  
56  
57

58  
59 Priorities are the front door, A&E [Accident and Emergency], Clinical Decisions Unit, waiting  
60 times and, it's those things that they are being judged on.



1  
2 Interviewer: Why do you think this is not a priority at all?  
3

4  
5 Just because they've got bigger fish to fry. ... But it's not a priority for the [organization]  
6 because of all the other things by which they are measured. And young people's care isn't on  
7 that list. (Manager, Adult Hospital)  
8  
9

10  
11 In the current context of the factors that drove organisational change at this site, creating further  
12 engagement and buy-in from senior management were not seen as practical solution. Issues about  
13 the care of young people remained focused in the informal, organisation-wide group, of young  
14 people's enthusiasts. As we discovered, not everyone interested in the care of young people in that  
15 organisation was aware of the existence of that group. Even those within the group were often  
16 unaware of the range of young person-orientated initiatives that were occurring within their  
17 organisation.  
18  
19

20  
21  
22  
23 At the remaining hospital specific training around the topic of DAH was observed being planned and  
24 delivered. A DAH strategy emerged as the result of the work of key people who sat on a transition  
25 strategy group. The group comprised of managers and health professionals, who met bi-monthly.  
26 There was strong cross-over between managerial and clinical levels and they worked to actively  
27 foster communication and create connections across services. The ideas emerged from the local  
28 special interest group, but the dissemination was targeted well beyond that group. Part of this  
29 involved looking where change was currently occurring within the organisation, alongside the  
30 broader national agendas on young people's health, in order to harness that momentum and get  
31 people involved.  
32  
33  
34  
35  
36  
37  
38

39  
40 The focus of the strategy and training was on organisational level factors (e.g. staff appraisal  
41 including training goals around young people; provision of age-banded clinics), clinic and  
42 consultation level factors (e.g. signpost sexual health, drug and alcohol services; copying clinic letters  
43 to young people), and training and awareness factors (e.g. adolescent development; confidentiality).  
44 This programme of training had senior management support, albeit initially only from child health,  
45 alongside access to resources. Using money to 'back fill' was seen as a key component in the success  
46 of the roll-out of training, as without this departments would not only be unwilling but also unable  
47 to release staff for training.  
48  
49  
50  
51  
52

53  
54 Last year we did, um, we did ten days, so ten individual day sessions for training in  
55 adolescent, basic adolescent health. Basically to increase awareness across the  
56 [organisation] so as to make sure it wasn't just the, the chronic illness patients that were  
57 being looked at ... but it was the patients coming through A&E, coming through X-ray ... just  
58  
59  
60

to get them aware of what a young person's needs are and why they're different to being an adult (Health Professional, General Hospital).

Central norms and practices of good, everyday, care for young people were distributed well beyond the local existing networks. The initiative emerged from, and depended on, their enthusiasm and expertise. The network of trust of young person-orientated practitioners was then supported by key actors within wider management. This led to an on-going training programme that sought to make the young people's healthcare visible across the organization, to begin to get to people to reappraise values and commitment.

## DISCUSSION

Across each organisation a complex, distributed, network of adolescent-oriented practitioners understood the potential value and worth of practices and services for young people, such as DAH. Within and across organisations there is an informal knowledge economy of young people-oriented practitioners, teams and spaces. People have a preference for referring to other young person-orientated practitioners or spaces, to others within their networks of trust. Such referrals help to create, sustain and reinforce the network over time. As such we see evidence of strong communities of practice [29], focused on supporting and enacting adolescent medicine. Table 3 illustrates our results in relation to the four theoretical constructs of normalization process theory (NPT),[21].

**Table 3: The four constructs of Normalization Process Theory (NPT) mapped against practitioner groups**

| NPT Construct                                                                                 | Networks of young person-oriented practitioners and managers                                                                                                                                                              | Other practitioners and managers who work with young people                                                                                                                                                                                              |
|-----------------------------------------------------------------------------------------------|---------------------------------------------------------------------------------------------------------------------------------------------------------------------------------------------------------------------------|----------------------------------------------------------------------------------------------------------------------------------------------------------------------------------------------------------------------------------------------------------|
| <b>Coherence:</b> Do people make sense of DAH?                                                | See how DAH extends and is related to other approaches to care of young people; relatively shared understanding of purpose of DAH; understanding of impact of DAH on their work; and see potential value and worth of DAH | Diverse views on relationship to other approaches; lack of shared understanding of purpose of DAH; diverse understanding of potential impact of DAH on their work; uncertainty around of potential value and worth (especially, given competing demands) |
| <b>Cognitive Participation:</b> Do people get involved with providing DAH and stay committed? | They are the key people driving DAH forward; they see DAH as legitimate, generally core, part of role; are very willing to work with others to enable DAH; and motivated to deliver DAH                                   | Aware that key people are driving DAH forward (key young person-orientated practitioners); lack of agreement that DAH legitimate part of work; some are willing to work with others to enable                                                            |

|                                                                    |                                                                                                                                                                                                                                                        |                                                                                                                                                                                                                         |
|--------------------------------------------------------------------|--------------------------------------------------------------------------------------------------------------------------------------------------------------------------------------------------------------------------------------------------------|-------------------------------------------------------------------------------------------------------------------------------------------------------------------------------------------------------------------------|
|                                                                    | over time                                                                                                                                                                                                                                              | DAH; some are motivated to deliver over time                                                                                                                                                                            |
| <b>Collective Action:</b> Do people make DAH work in practice?     | DAH is operationalisable, especially within network; trust people in network to enact DAH, but less trust beyond; right mix of skills and training to undertake DAH in network, again, less beyond; in one site, clear support for DAH in organisation | Diverse views on workability of DAH and on trust about whether the right people are enacting DAH; lack of skills to undertake DAH, with training offered a one site; in one site, clear support for DAH in organisation |
| <b>Reflexive Monitoring:</b> Do people evaluate DAH as worthwhile? | Aware of impact of DAH; assess DAH as worthwhile and individually assess DAH as working well; enact DAH flexibly                                                                                                                                       | Unsure of impact of DAH; unsure of whether worthwhile (given competing demands) or working well in practice; may enact some elements of DAH flexibly                                                                    |

The potential for normalization of DAH is high within the group of young person-oriented practitioners and managers, as they make sense of, buy-into, enact, and evaluate it as worthwhile. Beyond the networks of young person-oriented practitioners and managers, we observed a low potential for normalization. There are differences in opinion about the meaning and worth of DAH, its organisational and policy relevance, its potential workability, and its resource and spatial allocation. At one hospital, providing an organisation-wide strategy and training offered a clear opportunity to increase the potential for normalization of DAH. Although not mandated, this programme of training, with support to 'back fill' those attending it, offered the greatest potential for an increase in people seeing (aspects of) DAH as legitimate, to increase buy-in and enrolment. This training has the potential to further extend the networks of young person-oriented practitioners and managers. It relied on buy-in and formal support from senior managers in both child and adult services to initiate and sustain it. The other two sites lacked any formal policy initiatives and any formal support and so had, at the time of fieldwork, a low potential to transform values and commitment across their respective organisations. At the start of the fieldwork, there was no national guidance on DAH. However, since the fieldwork, national guidance on transition [18] states that such care should be developmentally appropriate. This has the potential to enable change. The formal and informal groups with an interest in young peoples care at those sites would clearly need buy-in and formal support from senior managers.

1  
2  
3  
4  
5  
6  
7  
8  
9  
10 This is the first ethnographic study addressing the area of developmentally appropriate health care  
11 for young people. This study gathered considerable data from many sources. The focus on exploring  
12 the provision of health care for young people over time, within specific teams and specialities, as  
13 well as across an organisation, enabled us to demonstrate the diversity within and across  
14 professional, team, ward and organisational boundaries. However, we only focused on three  
15 different organisations. Notably, all these organisations had a reputation for undertaking research  
16 on the care young people, so may represent examples of 'good practice'. Given the timing of our  
17 fieldwork, we did not get the opportunity to observe the impact of the roll-out of training around  
18 DAH that occurred at the one of the NHS trusts. A potential limitation of the study is that no young  
19 people were interviewed. However there is a large literature of young people's experience in  
20 hospital settings but much less literature focussing on the perspective of health professionals and  
21 particularly of hospital managers.  
22  
23  
24  
25  
26  
27  
28  
29  
30

31  
32 Policy and research has emphasised the centrality of service delivery and workforce capacity issues  
33 to achieve successful integration and consistency of health services for all young people across  
34 organisations [8, 9]. The results presented here add to this evidence base as we observed how the  
35 community of practice, the networks of young person-orientated practitioners and managers also  
36 support and provide, through formal and informal means, training and development around young  
37 people's health. Previous research has shown that continuing medical education in adolescent  
38 health, can increase developmentally appropriate practices (such as confidential services) and has  
39 the potential to address systemic barriers to healthcare for young people.[30] Thus, the role of such  
40 networks may be vital to achieving any sustainable change in the provision of healthcare for young  
41 people. Across all the sites, young people's formal and informal champions were key to getting  
42 people involved in the healthcare of young people. Research has outlined the importance of staff  
43 attitudes as a key determinant of young people's satisfaction with care.[4, 31] Prior research has  
44 also shown the problem of staff turnover, if services rely on key individuals [32,33] . As such, there  
45 needs to be consistency of approach to developing local cultures of good practice that can withstand  
46 changes in personnel. In primary care, the Adolescent Champion model, which trains a  
47 multidisciplinary team of practice staff to deliver training to other staff and implement local quality  
48 improvement, has shown potential for sustainable change [34].  
49  
50  
51  
52  
53  
54  
55  
56  
57  
58  
59  
60

1  
2  
3  
4 Our findings suggest that there is a need for strong and clear guidelines, strategies and policies on  
5 the practical implementation of DAH at three levels: those of the individual young person and their  
6 family, the multidisciplinary team level and the organisation and/or system level. Our research  
7 informed the development of a toolkit for implementation of DAH at these levels which includes  
8 description of the models of good practice in terms of multidisciplinary working and training at the 3  
9 hospitals studied [35,36]. Since the fieldwork ended, additional guidance has been published  
10 including for the care of young people in acute care settings [37] which includes a focus on DAH,  
11 alongside national guidance on the need to implement DAH in relation to transitional care.[18] A  
12 focus on specific settings (like acute care) or contexts (like transition) has limitations as it can  
13 introduce or sustain inequities. Buy-in and formal support from senior managers in both child and  
14 adult services seems essential. Providing an institution-wide strategy and training seems key,  
15 particularly in view of the current unmet training needs reported in both paediatric [38] and adult  
16 physicians [39]. Currently adolescent and young adult medicine is not a recognised discipline in its  
17 own right in the UK unlike Australia and North America [40] although even when it is an established  
18 discipline, challenges remain, for example in the USA [41]. The 'informal' adolescent and young adult  
19 medicine community in the UK may also need to become more formally recognised. Young people  
20 should no longer be seen as 'vary rarely ill' or allowed to remain 'just below the radar', or seen as  
21 'too old' for child services or 'too young' for adult. Core principles underlying the practice of  
22 adolescent medicine, such as DAH, should not remain contested. We need to enable people to  
23 reappraise values and commitment, to understand them as a normal part of everyday service  
24 provision.  
25  
26  
27  
28  
29  
30  
31  
32  
33  
34  
35  
36  
37  
38  
39  
40  
41  
42  
43  
44

## References

1. World Health Organization. Young people's health: a challenge for society. Report of a Study Group on Young People and 'Health for All by the Year 2000', Technical Report Series, No. 731. Geneva: World Health Organization, 1996.
2. Mokdad AH, Forouzanfar MH, Daoud F, et al. Global burden of diseases, injuries, and risk factors for young people's health during 1990–2013: a systematic analysis for the Global Burden of Disease Study 2013. *Lancet* 2016;387:2383–401.
3. Patton GC, Sawyer SM, Santelli JS, et al. Our future: a Lancet commission on adolescent health and wellbeing. *Lancet* 2016;387:2423–78.

- 1  
2  
3 4. Ambresin A-E, Bennett K, Patton GC, et al. Assessment of Youth-Friendly Health Care: A  
4 Systematic Review of Indicators Drawn From Young People's Perspectives. *J Adolesc Health*  
5 2013;52:670–81.
- 6  
7 5. Sawyer SM, Ambresin A-E, Bennett KE, et al. A Measurement Framework for Quality Health  
8 Care for Adolescents in Hospital. *J Adolesc Health* 2014;55:484–90.
- 9  
10 6. Department of Health. You're welcome: Quality criteria for young people friendly services.  
11 2011. [https://www.gov.uk/government/publications/quality-criteria-for-young-people-](https://www.gov.uk/government/publications/quality-criteria-for-young-people-friendly-health-services)  
12 [friendly-health-services](https://www.gov.uk/government/publications/quality-criteria-for-young-people-friendly-health-services) (accessed 13 December 2018)
- 13  
14 7. Hargreaves DS, McDonagh JE, Viner RM. Validation of You're Welcome Quality Criteria for  
15 Adolescent Health Services Using Data From National Inpatient Surveys in England. *J Adolesc*  
16 *Health* 2013;52:50–57
- 17  
18 8. World Health Organization. Towards adolescent-responsive health systems: Steering the  
19 transition from adolescent-friendly projects to adolescent-responsive health systems. 2014.  
20 [http://apps.who.int/adolescent/second-decade/section6/page8/sdolescent-](http://apps.who.int/adolescent/second-decade/section6/page8/sdolescent-responsiveness.html)  
21 [responsiveness.html](http://apps.who.int/adolescent/second-decade/section6/page8/sdolescent-responsiveness.html) (accessed 13 Dec 2018)
- 22  
23 9. Hepburn CM, Cohen E, Bhawra J, et al. Health system strategies supporting transition to  
24 adult care. *Arch Dis Child* 2015;100:559–64.
- 25  
26 10. Hargreaves DS, Greaves F, Levay C, et al Comparison of Health Care Experience and Access  
27 Between Young and Older Adults in 11 High-Income Countries. *J Adolesc Health*. 2015  
28 Oct;57(4):413-20.
- 29  
30 11. Farre A, Wood V, Rapley T, et al. Developmentally appropriate healthcare for young people:  
31 a scoping study. *Arch Dis Child* 2015;100:144–51.
- 32  
33 12. Farre A, Wood V, McDonagh JE, et al. Health professionals' and managers' definitions of  
34 developmentally appropriate healthcare for young people: conceptual dimensions and  
35 embedded controversies. *Arch Dis Child* 2016;101:628–633.
- 36  
37 13. Sawyer SM. Developmentally appropriate healthcare for young people with chronic illness:  
38 Questions of philosophy, policy, and practice. *Pediatr Pulmonol* 2003;36:363–365.
- 39  
40 14. World Health Organisation. Geneva: World Health Organisation; 2002. Adolescent friendly  
41 health services: an agenda for change.
- 42  
43 15. Wright EK, Williams J, Andrews JM et al. Perspectives of paediatric and adult  
44 gastroenterologists on transfer and transition care of adolescents with inflammatory bowel  
45 disease. *Intern Med J*. 2014 May;44(5):490-6.
- 46  
47 16. Stollon N, Zhong Y, Ferris M, et al Chronological age when healthcare transition skills are  
48 mastered in adolescents/young adults with inflammatory bowel disease. *World J*  
49 *Gastroenterol*. 2017 May 14;23(18):3349-3355

17. Eaton CK, Davis MF, Gutierrez-Colina AM, et al Different Demands, Same Goal: Promoting Transition Readiness in Adolescents and Young Adults With and Without Medical Conditions. *J Adolesc Health*. 2017 Jun;60(6):727-733
18. National Institute for Health and Care Excellence (NICE). NICE guidelines [NG43] Transition from children's to adults' services for young people using health or social care services. 2016. <https://www.nice.org.uk/guidance/ng43> (accessed 13 Dec 2018).
19. Sawyer SM, Afifi RA, Bearinger LH, et al. Adolescence: a foundation for future health. *Lancet* 2012;379:1630–40.
20. Viner R. Life stage: Adolescence. In: Davies SC, ed. Annual Report of the Chief Medical Officer 2012, Our Children Deserve Better: Prevention Pays. London: Department of Health 2013. Chapter 8 page 1-11.
21. May C, Finch T. Implementing, Embedding, and Integrating Practices: An Outline of Normalization Process Theory. *Sociology* 2009;43:535–54.
22. Patton MQ. Qualitative research & evaluation methods. London: Sage 2002.
23. Rapley T. Some Pragmatics of Data Analysis. In: Silverman D, ed. Qualitative Research. London: Sage 2016:331-346.
24. Glaser BG. The Constant Comparative Method of Qualitative Analysis. *Soc Probl* 1965;12:436–45.
25. Seale C. The Quality of Qualitative Research. London: Sage 1999.
26. Saunders B, Sim J, Kingstone T, et al. Saturation in qualitative research: exploring its conceptualization and operationalization. *Quality & Quantity*. 2018 Jul 1;52(4):1893-907.
27. Transition Research Programme. <http://research.ncl.ac.uk/transition/index.html> (accessed 13 December 2018).
28. Colver A, McConachie H, Le Couteur A et al . A longitudinal, observational study of the features of transitional healthcare associated with better outcomes for young people with long-term conditions. *BMC Med*. 2018 Jul 23;16(1):111.
29. Wenger, Etienne. Communities of practice: Learning, meaning, and identity. Cambridge University Press, 1999.
30. Sancu L, Coffey C, Patton G, et al. Sustainability of change with quality general practitioner education in adolescent health: a 5-year follow-up. *Med Educ*. 2005;39:557-60.
31. Shaw KL, Watanabe A, Rankin E, et al. Walking the talk. Implementation of transitional care guidance in a UK paediatric and a neighbouring adult facility. *Child Care Health Dev* 2014;40:663-70.

- 1  
2  
3 32. Renju J, Andrew B, Nyalali K, et al . A process evaluation of the scale up of a youth-friendly  
4 health services initiative in northern Tanzania. *Journal of the International AIDS Society*. 2010  
5 Dec;13(1):32.  
6  
7 33. Geary RS, Gómez-Olivé FX, Kahn K, et al. Barriers to and facilitators of the provision of a  
8 youth-friendly health services programme in rural South Africa *BMC Health Serv Res*. 2014  
9 Jun 16;14:259.  
10  
11 34. Riley M, Patterson V, Lane JC, et al. The Adolescent Champion Model: Primary Care Becomes  
12 Adolescent-Centered via Targeted Quality Improvement. *J Pediatr*. 2018;193:229-36.  
13  
14 35. Transition Research Programme. Developmentally Appropriate Healthcare Toolkit. 2017.  
15 [https://www.northumbria.nhs.uk/quality-and-safety/clinical-trials/for-healthcare-](https://www.northumbria.nhs.uk/quality-and-safety/clinical-trials/for-healthcare-professionals/)  
16 [professionals/](https://www.northumbria.nhs.uk/quality-and-safety/clinical-trials/for-healthcare-professionals/) (accessed 13 Dec 2018)  
17  
18 36. McDonagh JE, Farre A, Gleeson H, et al. Making healthcare work for young people. *Arch Dis*  
19 *Child*. 2018 Jun;103(6):623.  
20  
21 37. Royal College of Physicians. Acute Care Toolkit 2015 [www.rcplondon.ac.uk/guidelines-](http://www.rcplondon.ac.uk/guidelines-policy/acute-care-toolkit-13-acute-care-adolescents-and-young-adults)  
22 [policy/acute-care-toolkit-13-acute-care-adolescents-and-young-adults](http://www.rcplondon.ac.uk/guidelines-policy/acute-care-toolkit-13-acute-care-adolescents-and-young-adults) (accessed 13 Dec  
23 2018).  
24  
25 38. Michaud PA, Schrier L, Ross-Russel R, et al. Paediatric departments need to improve  
26 residents' training in adolescent medicine and health: a position paper of the European  
27 Academy of Paediatrics. *Eur J Pediatr*. 2018 Apr;177(4):479-487.  
28  
29 39. Wright RJ, Howard EJ, Newbery N, Gleeson H. Training Gap. The present state of higher  
30 specialist training in adolescent and young adult health in medical specialties in the UK.  
31 *Future Healthcare Journal* 2017 Vol 4, No 2: 80–5  
32  
33 40. Kerem NC, Hardoff D. Adolescent health care education and training: insights from Israel. *Int*  
34 *J Adolesc Med Health*. 2016 Aug 1;28(3):303-7.  
35  
36 41. Jenkins RR. Adolescent medicine in the USA: a perspective on progress and lessons learnt.  
37 *Arch Dis Child*. 2016 Jun;101(6):510-513.  
38  
39  
40  
41  
42  
43  
44  
45  
46  
47  
48  
49  
50  
51  
52  
53  
54  
55  
56  
57  
58  
59  
60



## Standards for Reporting Qualitative Research (SRQR)\*

<http://www.equator-network.org/reporting-guidelines/srqr/>

Page/line no(s).

### Title and abstract

|                                                                                                                                                                                                                                                              |        |
|--------------------------------------------------------------------------------------------------------------------------------------------------------------------------------------------------------------------------------------------------------------|--------|
| <p><b>Title</b> - Concise description of the nature and topic of the study Identifying the study as qualitative or indicating the approach (e.g., ethnography, grounded theory) or data collection methods (e.g., interview, focus group) is recommended</p> | Page 1 |
| <p><b>Abstract</b> - Summary of key elements of the study using the abstract format of the intended publication; typically includes background, purpose, methods, results, and conclusions</p>                                                               | Page 1 |

### Introduction

|                                                                                                                                                                     |        |
|---------------------------------------------------------------------------------------------------------------------------------------------------------------------|--------|
| <p><b>Problem formulation</b> - Description and significance of the problem/phenomenon studied; review of relevant theory and empirical work; problem statement</p> | Page 4 |
| <p><b>Purpose or research question</b> - Purpose of the study and specific objectives or questions</p>                                                              | Page 4 |

### Methods

|                                                                                                                                                                                                                                                                                                                                                                                                             |        |
|-------------------------------------------------------------------------------------------------------------------------------------------------------------------------------------------------------------------------------------------------------------------------------------------------------------------------------------------------------------------------------------------------------------|--------|
| <p><b>Qualitative approach and research paradigm</b> - Qualitative approach (e.g., ethnography, grounded theory, case study, phenomenology, narrative research) and guiding theory if appropriate; identifying the research paradigm (e.g., postpositivist, constructivist/ interpretivist) is also recommended; rationale**</p>                                                                            | Page 5 |
| <p><b>Researcher characteristics and reflexivity</b> - Researchers' characteristics that may influence the research, including personal attributes, qualifications/experience, relationship with participants, assumptions, and/or presuppositions; potential or actual interaction between researchers' characteristics and the research questions, approach, methods, results, and/or transferability</p> | Page 5 |
| <p><b>Context</b> - Setting/site and salient contextual factors; rationale**</p>                                                                                                                                                                                                                                                                                                                            | Page 5 |
| <p><b>Sampling strategy</b> - How and why research participants, documents, or events were selected; criteria for deciding when no further sampling was necessary (e.g., sampling saturation); rationale**</p>                                                                                                                                                                                              | Page 5 |
| <p><b>Ethical issues pertaining to human subjects</b> - Documentation of approval by an appropriate ethics review board and participant consent, or explanation for lack thereof; other confidentiality and data security issues</p>                                                                                                                                                                        | Page 5 |
| <p><b>Data collection methods</b> - Types of data collected; details of data collection procedures including (as appropriate) start and stop dates of data collection and analysis, iterative process, triangulation of sources/methods, and modification of procedures in response to evolving study findings; rationale**</p>                                                                             | Page 5 |

|    |                                                                                         |                 |
|----|-----------------------------------------------------------------------------------------|-----------------|
| 1  |                                                                                         |                 |
| 2  |                                                                                         |                 |
| 3  | <b>Data collection instruments and technologies</b> - Description of instruments (e.g., |                 |
| 4  | interview guides, questionnaires) and devices (e.g., audio recorders) used for data     |                 |
| 5  | collection; if/how the instrument(s) changed over the course of the study               | Page 5          |
| 6  |                                                                                         |                 |
| 7  | <b>Units of study</b> - Number and relevant characteristics of participants, documents, |                 |
| 8  | or events included in the study; level of participation (could be reported in results)  | Page 6, Table 1 |
| 9  |                                                                                         |                 |
| 10 | <b>Data processing</b> - Methods for processing data prior to and during analysis,      |                 |
| 11 | including transcription, data entry, data management and security, verification of      |                 |
| 12 | data integrity, data coding, and anonymization/de-identification of excerpts            | Page 6          |
| 13 |                                                                                         |                 |
| 14 | <b>Data analysis</b> - Process by which inferences, themes, etc., were identified and   |                 |
| 15 | developed, including the researchers involved in data analysis; usually references a    |                 |
| 16 | specific paradigm or approach; rationale**                                              | Page 6          |
| 17 |                                                                                         |                 |
| 18 | <b>Techniques to enhance trustworthiness</b> - Techniques to enhance trustworthiness    |                 |
| 19 | and credibility of data analysis (e.g., member checking, audit trail, triangulation);   |                 |
| 20 | rationale**                                                                             | Page 6          |

## Results/findings

|    |                                                                                             |           |
|----|---------------------------------------------------------------------------------------------|-----------|
| 23 | <b>Synthesis and interpretation</b> - Main findings (e.g., interpretations, inferences, and |           |
| 24 | themes); might include development of a theory or model, or integration with                |           |
| 25 | prior research or theory                                                                    | Page 6-12 |
| 26 |                                                                                             |           |
| 27 | <b>Links to empirical data</b> - Evidence (e.g., quotes, field notes, text excerpts,        |           |
| 28 | photographs) to substantiate analytic findings                                              | Page 6-12 |
| 29 |                                                                                             |           |

## Discussion

|    |                                                                                           |            |
|----|-------------------------------------------------------------------------------------------|------------|
| 32 | <b>Integration with prior work, implications, transferability, and contribution(s) to</b> |            |
| 33 | <b>the field</b> - Short summary of main findings; explanation of how findings and        |            |
| 34 | conclusions connect to, support, elaborate on, or challenge conclusions of earlier        |            |
| 35 | scholarship; discussion of scope of application/generalizability; identification of       |            |
| 36 | unique contribution(s) to scholarship in a discipline or field                            | Page 12-14 |
| 37 |                                                                                           |            |
| 38 | <b>Limitations</b> - Trustworthiness and limitations of findings                          | Page 13    |
| 39 |                                                                                           |            |

## Other

|    |                                                                                            |        |
|----|--------------------------------------------------------------------------------------------|--------|
| 42 | <b>Conflicts of interest</b> - Potential sources of influence or perceived influence on    |        |
| 43 | study conduct and conclusions; how these were managed                                      | Page 3 |
| 44 |                                                                                            |        |
| 45 | <b>Funding</b> - Sources of funding and other support; role of funders in data collection, |        |
| 46 | interpretation, and reporting                                                              | Page 3 |
| 47 |                                                                                            |        |

\*The authors created the SRQR by searching the literature to identify guidelines, reporting standards, and critical appraisal criteria for qualitative research; reviewing the reference lists of retrieved sources; and contacting experts to gain feedback. The SRQR aims to improve the transparency of all aspects of qualitative research by providing clear standards for reporting qualitative research.

1  
2  
3  
4  
5  
6  
7  
8  
9  
10  
11  
12  
13  
14  
15  
16  
17  
18  
19  
20  
21  
22  
23  
24  
25  
26  
27  
28  
29  
30  
31  
32  
33  
34  
35  
36  
37  
38  
39  
40  
41  
42  
43  
44  
45  
46  
47  
48  
49  
50  
51  
52  
53  
54  
55  
56  
57  
58  
59  
60

\*\*The rationale should briefly discuss the justification for choosing that theory, approach, method, or technique rather than other options available, the assumptions and limitations implicit in those choices, and how those choices influence study conclusions and transferability. As appropriate, the rationale for several items might be discussed together.

**Reference:**

O'Brien BC, Harris IB, Beckman TJ, Reed DA, Cook DA. **Standards for reporting qualitative research: a synthesis of recommendations.** *Academic Medicine*, Vol. 89, No. 9 / Sept 2014  
DOI: 10.1097/ACM.0000000000000388

For peer review only

# BMJ Open

## Can we normalize developmentally appropriate health care for young people in UK hospital settings? An ethnographic study

|                                 |                                                                                                                                                                                                                                                                                                                                                                                                                                                                                                                                                                                                                                                                                                                                            |
|---------------------------------|--------------------------------------------------------------------------------------------------------------------------------------------------------------------------------------------------------------------------------------------------------------------------------------------------------------------------------------------------------------------------------------------------------------------------------------------------------------------------------------------------------------------------------------------------------------------------------------------------------------------------------------------------------------------------------------------------------------------------------------------|
| Journal:                        | <i>BMJ Open</i>                                                                                                                                                                                                                                                                                                                                                                                                                                                                                                                                                                                                                                                                                                                            |
| Manuscript ID                   | bmjopen-2019-029107.R2                                                                                                                                                                                                                                                                                                                                                                                                                                                                                                                                                                                                                                                                                                                     |
| Article Type:                   | Research                                                                                                                                                                                                                                                                                                                                                                                                                                                                                                                                                                                                                                                                                                                                   |
| Date Submitted by the Author:   | 16-Jul-2019                                                                                                                                                                                                                                                                                                                                                                                                                                                                                                                                                                                                                                                                                                                                |
| Complete List of Authors:       | Rapley, Tim; Northumbria University Department of Social Work and Communities, Social Work, Education and Community Wellbeing; Newcastle University, Institute of Health and Society<br>Farre, Albert; University of Dundee, School of Nursing and Health Sciences<br>Parr, Jeremy; Newcastle University, UK, Institute of Neuroscience<br>Wood, Victoria; University College London, Department of Applied Health Research<br>Reape, Debbie; Northumbria Healthcare NHS Foundation Trust<br>Dovey-Pearce, Gail; Northumbria Healthcare NHS Foundation Trust<br>McDonagh, Janet; University of Manchester, Arthritis Research UK Centre for Epidemiology, Centre for Musculoskeletal Research ; Manchester University NHS Foundation Trust |
| <b>Primary Subject Heading</b>: | Health services research                                                                                                                                                                                                                                                                                                                                                                                                                                                                                                                                                                                                                                                                                                                   |
| Secondary Subject Heading:      | Qualitative research                                                                                                                                                                                                                                                                                                                                                                                                                                                                                                                                                                                                                                                                                                                       |
| Keywords:                       | Adolescent Medicine, Adolescent Health Services, Developmentally Appropriate Healthcare, QUALITATIVE RESEARCH, Young Adults                                                                                                                                                                                                                                                                                                                                                                                                                                                                                                                                                                                                                |
|                                 |                                                                                                                                                                                                                                                                                                                                                                                                                                                                                                                                                                                                                                                                                                                                            |

SCHOLARONE™  
Manuscripts

# Can we normalize developmentally appropriate health care for young people in UK hospital settings? An ethnographic study

Tim Rapley M.A., Ph.D. <sup>a,b \*</sup>, Albert Farre Ph.D.<sup>c</sup> Jeremy R Parr M.B.Ch.B., M.D. <sup>d</sup>, Victoria Wood Ph.D. <sup>e</sup>, Debbie Reape M.B.A. <sup>f</sup>, Gail Dovey-Pearce D.Clin.Psych. <sup>f</sup>, Janet E McDonagh M.B.B.S. M.D. <sup>g,h,i</sup>.

<sup>a</sup> Institute of Health and Society, Newcastle University, Newcastle upon Tyne, UK

<sup>b</sup> Department of Social Work, Education and Community Wellbeing, Northumbria University, Newcastle upon Tyne, UK

<sup>c</sup> School of Nursing and Health Sciences, Dundee, UK

<sup>d</sup> Institute of Neuroscience, Newcastle University, Newcastle upon Tyne, UK

<sup>e</sup> Department of Applied Health Research, University College London, London, UK

<sup>f</sup> Northumbria Healthcare NHS Foundation Trust, Tyne and Wear, UK

<sup>g</sup> Arthritis Research UK Centre for Epidemiology, Centre for Musculoskeletal Research, University of Manchester, Manchester, UK

<sup>h</sup> NIHR Manchester Biomedical Research Centre, Manchester University NHS Foundation Trust, Manchester, UK

<sup>i</sup> Manchester Academic Health Science Centre, Manchester, UK

\*Address correspondence to: Tim Rapley, M.A., Ph.D., Department of Social Work, Education and Community Wellbeing, Northumbria University, Coach Lane Campus West, Newcastle, UK, NE7 7XA. Phone: 0191 215 6136; Fax: None; Email: [tim.rapley@northumbria.ac.uk](mailto:tim.rapley@northumbria.ac.uk).

**Word Count:** 4806 excluding tables

**Key Words:** Adolescent Medicine; Adolescent Health Services; Developmentally Appropriate Healthcare; Qualitative Research; Young Adults.

## ABSTRACT

**Objective** The World Health Organisation has argued that adolescent-responsive health systems are required. Developmentally appropriate healthcare (DAH) for young people is one approach that could underpin this move. The aim of this study was to explore the potential for DAH to become normalized, to become a routine, taken-for-granted, element of clinical practice.

**Design** Qualitative ethnographic study. Analyses were based on procedures from first-generation grounded theory and theoretically informed by normalization process theory.

**Setting** Two tertiary and one secondary care hospital in England.

**Participants** 192 participants, health professionals (n=121) and managers (n= 71) were recruited between June 2013-January 2015. Approximately 1600 hours of non-participant observations in clinics, wards and meeting rooms were conducted, alongside 65 formal qualitative interviews.

**Results** We observed diverse values and commitments towards the care of young people and provision of DAH, including a distributed network of young person-orientated practitioners. Informal networks of trust existed, where specific people, teams or wards were understood to have the right skill-mix, or mind-set, or access to resources, to work effectively with young people. As young people move through an organisation, the preference is to direct them to other young person-orientated practitioners, so inequities in skills and experience can be self-sustaining. At two sites, initiatives around adolescent and young adult training remained mostly within these informal networks of trust. At another, through support by wider management, we observed a programme that sought to make the young people's healthcare visible across the organization, and to get people to reappraise values and commitment.

**Conclusion** To move towards normalization of DAH within an organisation, we cannot solely rely on informal networks and cultures of young person-orientated training, practice and mutual referral and support. Organisation-wide strategies and training are needed, to enable better integration and consistency of health services for all young people.

**Strengths and limitations of this study**

- This is the first ethnographic study addressing the provision of developmentally appropriate health care for young people.
- Exploring the provision of health care for young people over time, within specific teams and specialities, as well as across an organisation, enabled us to explore the diversity of ways that health care for young people is currently delivered within and across professionals, teams, wards and organisations.
- We only focused on three different organisations and all these organisations had a reputation for undertaking research on the care young people, so may represent examples of 'good practice'.

1  
2  
3  
4  
5 **Funding Statement:** This article presents independent research funded by the National Institute for  
6 Health Research (NIHR) under the Programme Grants for Applied Research programme: RP-PG-  
7 0610-10112. The views expressed in this article are those of the authors and not necessarily those of  
8 the NHS, the NIHR or the Department of Health. The funder took no part in the collection, analysis or  
9 interpretation of the data, in the writing of the article nor in the decision to submit the article for  
10 publication.  
11  
12  
13  
14

15  
16 **Competing interests:** All authors have completed the ICMJE uniform disclosure form and declare  
17 they have no financial relationships from any organisation that might have an interest in the  
18 submitted work in the previous three years; and no other relationships or activities that could  
19 appear to have influenced the submitted work.  
20  
21  
22

23 **Sponsor:** The study sponsor, Northumbria Healthcare NHS Foundation Trust, had no role in the study  
24 design, in the collection, analysis, and interpretation of data, in the writing of the report, or in the  
25 decision to submit the article for publication. VW had an honorary contract with Northumbria  
26 Healthcare, and GD-P and DR were employed by Northumbria Healthcare.  
27  
28  
29  
30

31  
32 **Author Contributions:** TR, JMCD, JP and DR designed the original study. VW and AF carried out data  
33 collection and data analysis under the supervision of TR, JMCD, DR, GD-P and JP. TR and AF led on  
34 the writing of this manuscript. All authors worked on drafts of the paper and approved the final  
35 version of this article.  
36  
37  
38

39 **Acknowledgements:** We acknowledge the support of Dr Elizabeth Rankin for her support and the  
40 health professionals and staff at the 3 participating hospitals. We also thank all the members of the  
41 youth advisory group – UP – for their support and advice. \*\*The Transition Collaborative Group  
42 consists of: the authors of this paper; other co-applicants: Allan Colver, Helen McConachie, Mark S  
43 Pearce, Luke Vale, Caroline Bennett, Greg Maniatopoulos; advisors: Nichola Chater, Helena Gleeson.  
44  
45  
46  
47  
48

49 **Data availability statement:** No additional data is available. Data are difficult to anonymise and we  
50 had not sought permission for data sharing.  
51  
52  
53

54 **Supplementary Files:** Original Protocol; Standards for Reporting Qualitative Research (SRQR)  
55 Checklist.  
56  
57  
58  
59  
60



## INTRODUCTION

The health of young people, defined by the World Health Organisation as any person between ages 10 and 24 years,[1] is a neglected yet pressing global issue [2] affecting the largest generation in history.[3] Youth-friendly healthcare [4], promoted as a means to improve health services for young people, has underpinned quality of care and policy frameworks.[5-7] However, as highlighted by the WHO, there is the need to move from the ad hoc provision of youth-friendly healthcare services – often embedded in specific locations or teams - to adolescent-responsive healthcare systems [8]. All the aspects of health and social care that young people engage with, the range of providers, organisations and policies, need to more responsive to and aligned with the care of young people. Other work has also noted that health system-level strategies are needed to further develop and improve healthcare for young people [9,10]. Healthcare providers need to respond to young people's changing developmental needs in a manner that is consistent, universal and provided across healthcare settings. Such adolescent-responsive health systems should be flexible, and should focus on a broad range of aspects of healthcare provision, from the frontline (such as how healthcare professionals communicate with young people) through to the higher levels of healthcare provision (such as how services are planned and commissioned).

Developmentally appropriate healthcare (DAH) for young people [11-13] is one concept that could underpin an adolescent-responsive healthcare system (See Table 1).

**Table 1: The five dimensions of Developmentally appropriate healthcare (DAH)**

---

### Dimensions of DAH for Young People <sup>9-11</sup>

---

**Biopsychosocial development and holistic care:** a focus on biopsychosocial development rather than chronological age, with routine biopsychosocial developmental assessment and approach to the young person adjusted accordingly

**Acknowledgement of young people as a distinct group:** the recognition that their specific needs - in terms of informational resources, services, spaces, pathways and required competencies of staff - are distinctly different to those of younger children and older adults as a result of their developmental status.

**Adjustment of care as the young person develops:** the need for flexibility to acknowledge the biopsychosocial developmental changes over time and the potential for regression in relapsing health conditions

**Empowerment of the young person by embedding health education and health promotion:** that knowledge and skills training for young people is embedded into routine clinical practice to enable them to gradually become more autonomous with respect to the care of their own health as they grow up. Services need to be designed so as to nurture and support such skill development.

**Interdisciplinary and Inter-organisational work:** a focus on continuity of care, coordination, consistency

---

1  
2  
3 and communication across agencies. Connecting health, education, employment, social, voluntary  
4 agencies at a clinical and system level.  
5

---

6  
7  
8  
9  
10 In contrast to the more service-focussed nature of the youth friendly health service [14], DAH  
11 addresses the clinical approach to individual young people and specifically recognises the changing  
12 developmental needs of young people and the role of healthcare in addressing and supporting  
13 young people. DAH focuses on biopsychosocial development rather than chronological age.  
14  
15 Chronological age is recognised to be a poor indicator of developmental status particularly in the  
16 context of a long-term health condition [15]. Young people make this journey to adulthood in their  
17 own way; young people's development does not have a fixed period attached to it. Many  
18 developmental milestones are met after reaching the legal age of adulthood [16,17 ].  
19

20  
21  
22 Services underpinned by DAH have been reported nationally and internationally as a potential key  
23 mechanism to improve health outcomes for young people.[3,18] Increasing knowledge about the  
24 development of young people [19,20] offers unprecedented opportunities for service improvement.  
25 In the context of sub-optimal provision of healthcare for young people,[3,8] DAH offers the potential  
26 to transform traditional models of healthcare delivery into adolescent-responsive healthcare  
27 systems. However, the concept of DAH has been operationalized in a range of ways in the medical  
28 literature [11] and is understood in different ways by clinicians and managers in the NHS [12]. In this  
29 study, theoretically informed by Normalization Process Theory (NPT)[21], we investigated the  
30 potential for normalization of DAH within three UK hospitals. NPT identifies, characterises, and  
31 explains aspects of individual and collective behaviour shown to be important in empirical studies of  
32 the introduction, embedding and integration of change [21]. Normalization is achieved when a  
33 technique, technology or organisational change becomes a routine and taken-for-granted element  
34 of clinical practice.  
35  
36  
37  
38  
39  
40  
41  
42  
43  
44  
45  
46  
47

## 48 **METHODS**

49  
50  
51 This ethnographic study was conducted across three hospitals in two regions of England (a district  
52 general hospital, a large paediatric tertiary hospital and a large adult tertiary hospital) all in urban  
53 settings outside London. All hospitals had a history of championing research and innovative service  
54 provision for young people. At the start of the fieldwork one site – the General Hospital - was  
55 developing a policy about DAH. This had emerged from a formal, organisationally-supported, group  
56 that focused on the care of young people, that was initially formed to focus on transition. This  
57  
58  
59  
60

strategy group comprised of managers and senior clinicians. At another site - the Paediatric Hospital - there was no explicit policy on DAH, but one focused on transition. They also had a formal, organisationally-supported, group focused on young people. However, thinking about DAH was being driven by enthusiasts alone. Finally, the third site had no policy on DAH, transition or young people. The sole organisation-wide initiative is an informal interest group focused on young people issues. Health professionals, recruited through six medical and surgical specialties (Diabetes, Emergency Care, General Paediatrics, Outpatients, Rheumatology, and Trauma and Orthopaedics), were chosen to represent the heterogeneous services found in UK National Health Service (NHS) hospitals. Managers were recruited at each site when their roles were relevant to the provision of services for young people in paediatrics and/or adult care. The study received a favourable opinion from the National Research Ethics Committee (12/NE/0423).

Data collection took place over three phases, between June 2013 and January 2015. Recruitment was initially mediated through gatekeepers. Participants were purposively sampled, initially through maximum variation sampling and then refined through snowball sampling and theoretical. [22] Participants were approached to take part in the study using a variety of methods including face-to-face, telephone and email. A total of 192 participants (professionals and managers) were recruited (Table 2).

**Table 2 - Recruitment for the study by site, type of staff and method of data collection**

|                                                      |                      | <b>District<br/>General<br/>Hospital</b> | <b>Paediatric<br/>Tertiary<br/>Hospital</b> | <b>Adult<br/>Tertiary<br/>Hospital</b> | <b>Total</b> |
|------------------------------------------------------|----------------------|------------------------------------------|---------------------------------------------|----------------------------------------|--------------|
| <b>Participants<br/>observed only</b>                | Health professionals | 53                                       | 22                                          | 10                                     | 85           |
|                                                      | Managers             | 43                                       | 0                                           | 12                                     | 55           |
|                                                      | <b>Total</b>         | <b>96</b>                                | <b>22</b>                                   | <b>22</b>                              | <b>140</b>   |
| <b>Participants<br/>interviewed<br/>only</b>         | Health professionals | 0                                        | 14                                          | 9                                      | 23           |
|                                                      | Managers             | 0                                        | 5                                           | 2                                      | 7            |
|                                                      | <b>Total</b>         | <b>0</b>                                 | <b>19</b>                                   | <b>11</b>                              | <b>30</b>    |
| <b>Participants<br/>interviewed<br/>and observed</b> | Health professionals | 8*                                       | 4                                           | 1                                      | 13           |
|                                                      | Managers             | 5*                                       | 1                                           | 3                                      | 9            |
|                                                      | <b>Total</b>         | <b>13</b>                                | <b>5</b>                                    | <b>4</b>                               | <b>22</b>    |

|                                     |            |           |           |            |
|-------------------------------------|------------|-----------|-----------|------------|
| <b>Total number of participants</b> | <b>109</b> | <b>46</b> | <b>37</b> | <b>192</b> |
|-------------------------------------|------------|-----------|-----------|------------|

\*Participants interviewed twice

Approximately 1600 hours of non-participant observations were conducted by two researchers, (AF, VW) alongside 65 formal qualitative interviews. Researchers had specific training and extensive experience in conducting qualitative research and had no relationship with the participants. Observations were conducted within and across a wide variety of hospital spaces – including clinics, wards and meeting rooms - depending on the nature of the session and/or the professionals involved. They were recorded in contemporaneous fieldnotes. Participants were selected for formal interviews to follow-up specific issues emerging from observation sessions and/or prior interviews. Formal interviews (average length, 45 minutes) were conducted face-to-face on a one-to-one basis and were audio-recorded, transcribed, edited to ensure respondents anonymity and then analysed alongside anonymised fieldnotes. Initial topic guides were designed for clinicians and managers irrespective of setting and evolved during the course of data collection, allowing for tailoring and gradual integration of a variety of follow-up issues and topics of relevance to specific roles, settings, specialities or areas. Observation and interviews focused on the organisation of services for young people, including (intra-/inter-) organisational, team and individual aspects of provision, training and support, and patient involvement as well as emerging topics identified through concurrent data analysis.

All analysis was conducted according to the standard procedures of rigorous qualitative analysis by AF, VW and TR.[23] We used procedures from first-generation grounded theory - coding, constant comparison, memoing [24] - and from analytic induction, deviant case analysis.[25] Sampling, data collection and analysis occurred concurrently, so that issues raised in earlier phases of fieldwork were explored subsequently to enable conceptual saturation [26]. We undertook independent coding and cross checking, team data sessions and member validation with some of the participants in the fieldwork. The analysis was assisted by QSR NVivo 10 software and theoretically-informed by Normalization Process Theory[21]. In presenting the analysis, we have drawn on interview quotes, over excerpts from fieldnotes, as they offer the reader rapid access to the key analytic ideas.

### **Patient and Public Involvement**

This study was part of a larger longitudinal programme of research focused on the commissioning and provision of healthcare services for young people [27,28]. The research questions for the programme were initially informed by engagements with a pre-existing young people's advisory

1  
2  
3 group, third-sector voluntary agencies and pupils from a school for young people with physical  
4 impairments and students from a living skills course at a college. A young people's advisory group  
5 was established as part of programme and supported all studies within the programme. The group  
6 advised on practical (e.g. recruitment) and conceptual issues (e.g. design of study, discussion of key  
7 findings and concepts) for this specific study. Young people led on aspects of dissemination,  
8 including the production of a video about DAH, for this study.  
9  
10  
11  
12  
13

## 14 RESULTS

15  
16  
17 We identified diverse values and commitments towards the care of young people and provision of  
18 DAH across organisations, specialities and staff. We observed a range of informal cultures of good  
19 practice implementing core elements of DAH, alongside formal and informal cultures of training  
20 around DAH and the provision of care of young people.  
21  
22  
23  
24

### 25 Diverse values and commitments

26  
27 When discussing the provision of care for young people, many focused on the need to create a more  
28 age appropriate environment, in terms of physical space, the visual and material culture of waiting  
29 room and wards. Others, especially those who worked regularly with young people, discussed  
30 features such as appropriate communication, confidentiality and a more holistic focus. As one  
31 manager noted:  
32  
33  
34  
35

36  
37 The young people have told us that, um, we need, they're not bothered about where they  
38 are seen so, as in, what the building's look like or what the clinic room looks like. They want  
39 to make sure that they see somebody who's interested and who knows what their disease is  
40 like, but also has an awareness of all the other stuff that's going on when they're 16 to 18  
41  
42  
43 (Manager, General Hospital)  
44

45  
46 At this hospital, involvement was considered to be part of patient experience, and young people  
47 were involved in such activities as the, attendance at governance meetings and training of staff.  
48 Young people's experiences were an important influence on this manager's understanding of  
49 'appropriate' service provision.  
50  
51  
52

53  
54 There were conflicting views on the value and worth of enacting DAH across the organisations. The  
55 numbers of young people accessing health services were often portrayed as small, so in  
56 organisational terms they were 'just below the radar'. In contrast to older, especially elderly  
57 patients, they were also seen as 'very rarely unwell'. This led some to question whether  
58  
59  
60

1  
2  
3 professionals should be adjusting their practices or offering distinct, tailored, services, as there are  
4 always competing demands for resources, time and expertise.  
5

6  
7 It's small enough [numbers] that if you don't, if you don't buy into it, there's plenty to be  
8 getting on with the other 90%. And everybody's jobs are so frantic that you could easily do a  
9 very good job with that 90% who are 25, 26 plus. ... So, you could actually ignore these  
10 young people completely. (Manager, Adult Hospital)  
11  
12

13  
14 Questions of legitimacy and buy-in, or rather, enrolment, are central to individual, team and  
15 organisational change. In part, this lack of capacity and willingness seems to be compounded by the  
16 liminal status of young people within the organisational and professional culture of the UK  
17 healthcare system:  
18  
19

20  
21  
22 Adults don't really want them because they are too young and the paediatricians don't really  
23 want them because they are too old (Health Professional, General Hospital).  
24  
25

26 With the exception of charity-supported oncology wards, adolescent only wards, or spaces within  
27 wards, were rare and were often subject to dissolution if there were competing demands. None of  
28 the sites had a senior clinical or management lead with responsibility for young people's service  
29 development.  
30  
31

32  
33 However, across all the sites we did observe a complex network of young person-orientated  
34 practitioners, people acting as young people 'enthusiasts', or 'champions', within specific clinical or  
35 management teams in either a formal or informal capacity. Some specific services and practices  
36 were organised around the care of young people. However, relying on the enthusiasm and  
37 willingness of specific individuals can become problematic.  
38  
39  
40

41  
42  
43 Several people have left, who have been very senior members and very adolescent minded  
44 and have been replaced by either rotational posts or part-time posts, so that continuity  
45 within our team and the wealth of expertise has been impacted on significantly. (Health  
46 Professional, Paediatric Hospital).  
47  
48

49  
50 A focus on champions raises key questions about the sustainability of services for young people over  
51 time.  
52  
53

#### 54 **Informal cultures of good practice**

55  
56  
57 Across all three hospitals, we observed local cultures – in teams, clinics, wards and meetings – where  
58 professionals attempted to enact a philosophy of care towards young people. They were driven by  
59  
60

1  
2  
3 an awareness of how approaching young people in a different way can mean that young people  
4 'might take the right messages away, might not end up neglecting their health needs, damaging  
5 themselves' (Manager, General Hospital). For these professionals, working with young people  
6 required a specific mind-set and skill-set.  
7  
8

9  
10 At its simplest level this often involved the ability of the professional, or the multi-disciplinary team,  
11 to communicate effectively, listening to young people about their health needs and asking them  
12 questions, about their broader psychosocial situation. Care is contextualised by gathering  
13 information about a young person's life, including educational, vocational, social, friendship and  
14 family issues; and exploring risk and resilience factors. Such information is used by teams to  
15 generate an appropriate context for effective communication, inform interventions and to organise  
16 consultations, including offering appropriate health education and support for self-management.  
17  
18

19  
20 Providing an appropriate service for young people is often a deeply rooted value for these  
21 individuals and groups. The 'You're Welcome Quality Criteria' [6] were generally well known,  
22 including core issues such confidentiality and consent, joined-up working, transition and  
23 accessibility. Within the context of adult care, failure to attend appointments was a prevalent issue.  
24 Ways of dealing with this varied and we were told about what was referred to as, 'a softer approach  
25 to the DNAs (did not attend)'  
26  
27  
28  
29  
30  
31  
32

33  
34 The organisation ruling of one strike and you're out, we don't adhere to, so we will give  
35 them multiple attempts to come into clinic ... we don't actually put them as a DNA, because  
36 they just booked in [the consultants] calendar but we don't actually book it on the system so  
37 they don't officially come as a DNA ... So I'll make informal appointments with the young  
38 people and then, when they arrive we book them into clinic, so that way they don't DNA  
39  
40  
41  
42 (Health Professional, Adult Hospital).  
43

44  
45 Working creatively within the existing norms, rules and resources was characteristic of those who  
46 believed that young people needed to be recognized as a group with specific needs and approaches.  
47

48  
49 We observed across all the organisations 'lots of great pockets of work' as some specialties, teams,  
50 people or spaces offered very strong young person-orientated care. However, not all people or  
51 services felt it relevant to make 'special arrangements', but chose instead to treat young people like  
52 'an ordinary patient'. Alongside this, the uneven distribution of resources within and across  
53 specialties created inequities of care.  
54  
55

56  
57  
58 There are ... areas in the hospital who, because they have more funding or they're funded in  
59 a different way, they might have a youth worker because it's part of their team and just for  
60

1  
2  
3 their team. They might have a psychologist who is just part of their team. ... it very much  
4 depends on what speciality you're unfortunate to fall into, depending on what illness you've  
5 got as to what service you then get. ... (Health Professional, Paediatric Hospital)  
6  
7

8 However, resources were not the only source of inequities. In part the inequities in skills and  
9 experience across the organisations seemed to be self-sustaining within organisations. Those with  
10 an interest, the 'enthusiasts', were embedded in an informal network of care.  
11  
12

13  
14 we've now got a group of interested people across the [organisation]. So if a young person  
15 comes to me and they've got a, a joint problem, but they've also got a bowel problem, I  
16 know which bowel consultant and which bowel nurse will be the most appropriate to send  
17 them to. ... Um, so we've got a good group of people across the [organisation] that we can  
18 actually send these youngsters to who've got more awareness of the issues that they could  
19 have (Health Professional, General Hospital)  
20  
21  
22  
23  
24

25 An informal knowledge economy of young person-orientated practitioners and practices existed  
26 within the organisations. These were networks of trust. These referrals helped to create, sustain  
27 and reinforce the network over time. This practice also existed across organisations, especially in  
28 terms of the transfer of young people to adult services. Young person-orientated practitioners  
29 referred to other young person-orientated practitioners – in this way, they worked to actively avoid  
30 referring young people to those they felt maybe less young person-orientated. These people then  
31 gained less practical experience with managing these patients, and so had less chance to reappraise  
32 their values and commitment to working with young people in new ways, as well as to develop the  
33 right skill-mix.  
34  
35  
36  
37  
38  
39

40 An informal network also existed in terms of spaces. At each site, at least one specific ward was  
41 known to offer more young person-orientated care. They were seen as repositories of knowledge  
42 and skills, able to advise on or manage potentially challenging behaviour.  
43  
44  
45

46  
47 We were getting so much enquiries regarding adolescents from the other wards, even just  
48 for the basics. ... So, they would ring us and say, "We can't get them out of bed in the  
49 morning". You know, "they just want to stay in bed all the time and they don't want to  
50 interact with anything". So we would say, "Well then you have to be stern, you know, you  
51 have to tell them, 'This is the plan,' you have to do a contract with them and agree with  
52 them that if they get over this time, then they can do this at this time" (Health Professional,  
53 Paediatric Hospital).  
54  
55  
56  
57  
58  
59  
60



1  
2  
3 It is not only that 'just different wards have a different tolerance', but rather that different wards  
4 and teams, developed, over time, different understanding and a different sense of what was  
5 legitimate work, as well as developmentally appropriate skills, competencies and routines.  
6  
7

8 In some situations, we've had patients on our general wards where the parent has wanted  
9 to stay. And we, my nurses, would find that very strange. But actually, in oncology, that  
10 would not be strange at all. Because ... [they] would be used to that, even a patient could be  
11 22, 23 and still may want their mum. But they're not exposed to that in the main wards.  
12  
13 (Health Professional, Adult Hospital)  
14  
15  
16

17 Exposure to working with young people was central to adjusting expectations, enabling them to  
18 longer see young people as having 'strange' requests or being particularly 'difficult' to work with.  
19 Exposure offered a chance to develop new skills.  
20  
21  
22

### 23 **(In)formal cultures of training**

24 Within each of the organisations there were formal and informal groups at which the young person-  
25 orientated enthusiasts met and supported each other collectively. Essentially, these groups were a  
26 collective effort to promote initiatives to raise awareness across the organisations, create change,  
27 offer support and, importantly, learn from each other outwith their team, area or specialty.  
28  
29  
30  
31  
32

33 I have nothing in writing in my job plan that says I specialise in young people. ... Nobody said,  
34 "If you want to be a young adult person, you need to go on this [training course]". It's just  
35 something that I became aware of through organisations or talking to people. So, it's all  
36 quite ad-hoc rather than really, really planned. And it's just really by hearsay and talking to  
37 people and networking throughout [this organisation] over many years. (Health Professional,  
38 Paediatric Hospital)  
39  
40  
41  
42  
43

44 Without any formalised professional routes available, the local, regional and national special  
45 interests groups became a central resource for supporting adolescent and young adult health  
46 training across the organisations.  
47  
48  
49

50 At two hospitals, the only initiatives involving training around young people originated from their  
51 respective special interest groups, in the form of annual study days. At one of these hospitals, there  
52 was a policy initiative explicitly around transition, yet no specific training had been organised. At the  
53 other, development of a formal policy was said to be 'not a priority for the organisation'.  
54  
55  
56

57 Priorities are the front door, A&E [Accident and Emergency], Clinical Decisions Unit, waiting  
58 times and, it's those things that they are being judged on.  
59  
60

1  
2 Interviewer: Why do you think this is not a priority at all?  
3

4  
5 Just because they've got bigger fish to fry. ... But it's not a priority for the [organization]  
6 because of all the other things by which they are measured. And young people's care isn't on  
7 that list. (Manager, Adult Hospital)  
8  
9

10  
11 In the current context of the factors that drove organisational change at this site, creating further  
12 engagement and buy-in from senior management were not seen as practical solution. Issues about  
13 the care of young people remained focused in the informal, organisation-wide group, of young  
14 people's enthusiasts. As we discovered, not everyone interested in the care of young people in that  
15 organisation was aware of the existence of that group. Even those within the group were often  
16 unaware of the range of young person-orientated initiatives that were occurring within their  
17 organisation.  
18  
19

20  
21  
22  
23 At the remaining hospital specific training around the topic of DAH was observed being planned and  
24 delivered. A DAH strategy emerged as the result of the work of key people who sat on a transition  
25 strategy group. The group comprised of managers and health professionals, who met bi-monthly.  
26 There was strong cross-over between managerial and clinical levels and they worked to actively  
27 foster communication and create connections across services. The ideas emerged from the local  
28 special interest group, but the dissemination was targeted well beyond that group. Part of this  
29 involved looking where change was currently occurring within the organisation, alongside the  
30 broader national agendas on young people's health, in order to harness that momentum and get  
31 people involved.  
32  
33  
34  
35  
36  
37  
38

39  
40 The focus of the strategy and training was on organisational level factors (e.g. staff appraisal  
41 including training goals around young people; provision of age-banded clinics), clinic and  
42 consultation level factors (e.g. signpost sexual health, drug and alcohol services; copying clinic letters  
43 to young people), and training and awareness factors (e.g. adolescent development; confidentiality).  
44 This programme of training had senior management support, albeit initially only from child health,  
45 alongside access to resources. Using money to 'back fill' was seen as a key component in the success  
46 of the roll-out of training, as without this departments would not only be unwilling but also unable  
47 to release staff for training.  
48  
49  
50  
51  
52

53  
54 Last year we did, um, we did ten days, so ten individual day sessions for training in  
55 adolescent, basic adolescent health. Basically to increase awareness across the  
56 [organisation] so as to make sure it wasn't just the, the chronic illness patients that were  
57 being looked at ... but it was the patients coming through A&E, coming through X-ray ... just  
58  
59  
60

to get them aware of what a young person's needs are and why they're different to being an adult (Health Professional, General Hospital).

Central norms and practices of good, everyday, care for young people were distributed well beyond the local existing networks. The initiative emerged from, and depended on, their enthusiasm and expertise. The network of trust of young person-orientated practitioners was then supported by key actors within wider management. This led to an on-going training programme that sought to make the young people's healthcare visible across the organization, to begin to get to people to reappraise values and commitment.

## DISCUSSION

Across each organisation a complex, distributed, network of adolescent-oriented practitioners understood the potential value and worth of practices and services for young people, such as DAH. Within and across organisations there is an informal knowledge economy of young people-oriented practitioners, teams and spaces. People have a preference for referring to other young person-orientated practitioners or spaces, to others within their networks of trust. Such referrals help to create, sustain and reinforce the network over time. As such we see evidence of strong communities of practice [29], focused on supporting and enacting adolescent medicine. Table 3 illustrates our results in relation to the four theoretical constructs of normalization process theory (NPT),[21].

**Table 3: The four constructs of Normalization Process Theory (NPT) mapped against practitioner groups**

| NPT Construct                                                                                 | Networks of young person-oriented practitioners and managers                                                                                                                                                              | Other practitioners and managers who work with young people                                                                                                                                                                                              |
|-----------------------------------------------------------------------------------------------|---------------------------------------------------------------------------------------------------------------------------------------------------------------------------------------------------------------------------|----------------------------------------------------------------------------------------------------------------------------------------------------------------------------------------------------------------------------------------------------------|
| <b>Coherence:</b> Do people make sense of DAH?                                                | See how DAH extends and is related to other approaches to care of young people; relatively shared understanding of purpose of DAH; understanding of impact of DAH on their work; and see potential value and worth of DAH | Diverse views on relationship to other approaches; lack of shared understanding of purpose of DAH; diverse understanding of potential impact of DAH on their work; uncertainty around of potential value and worth (especially, given competing demands) |
| <b>Cognitive Participation:</b> Do people get involved with providing DAH and stay committed? | They are the key people driving DAH forward; they see DAH as legitimate, generally core, part of role; are very willing to work with others to enable DAH; and motivated to deliver DAH                                   | Aware that key people are driving DAH forward (key young person-orientated practitioners); lack of agreement that DAH legitimate part of work; some are willing to work with others to enable                                                            |

|                                                                    |                                                                                                                                                                                                                                                        |                                                                                                                                                                                                                         |
|--------------------------------------------------------------------|--------------------------------------------------------------------------------------------------------------------------------------------------------------------------------------------------------------------------------------------------------|-------------------------------------------------------------------------------------------------------------------------------------------------------------------------------------------------------------------------|
|                                                                    | over time                                                                                                                                                                                                                                              | DAH; some are motivated to deliver over time                                                                                                                                                                            |
| <b>Collective Action:</b> Do people make DAH work in practice?     | DAH is operationalisable, especially within network; trust people in network to enact DAH, but less trust beyond; right mix of skills and training to undertake DAH in network, again, less beyond; in one site, clear support for DAH in organisation | Diverse views on workability of DAH and on trust about whether the right people are enacting DAH; lack of skills to undertake DAH, with training offered a one site; in one site, clear support for DAH in organisation |
| <b>Reflexive Monitoring:</b> Do people evaluate DAH as worthwhile? | Aware of impact of DAH; assess DAH as worthwhile and individually assess DAH as working well; enact DAH flexibly                                                                                                                                       | Unsure of impact of DAH; unsure of whether worthwhile (given competing demands) or working well in practice; may enact some elements of DAH flexibly                                                                    |

The potential for normalization of DAH is high within the group of young person-oriented practitioners and managers, as they make sense of, buy-into, enact, and evaluate it as worthwhile. Beyond the networks of young person-oriented practitioners and managers, we observed a low potential for normalization. There are differences in opinion about the meaning and worth of DAH, its organisational and policy relevance, its potential workability, and its resource and spatial allocation. At one hospital, providing an organisation-wide strategy and training offered a clear opportunity to increase the potential for normalization of DAH. Although not mandated, this programme of training, with support to 'back fill' those attending it, offered the greatest potential for an increase in people seeing (aspects of) DAH as legitimate, to increase buy-in and enrolment. This training has the potential to further extend the networks of young person-oriented practitioners and managers. It relied on buy-in and formal support from senior managers in both child and adult services to initiate and sustain it. The other two sites lacked any formal policy initiatives and any formal support and so had, at the time of fieldwork, a low potential to transform values and commitment across their respective organisations. At the start of the fieldwork, there was no national guidance on DAH. However, since the fieldwork, national guidance on transition [18] states that such care should be developmentally appropriate. This has the potential to enable change. The formal and informal groups with an interest in young people's care at those sites would clearly need buy-in and formal support from senior managers.

1  
2  
3  
4  
5  
6  
7  
8  
9  
10 This is the first ethnographic study addressing the area of developmentally appropriate health care  
11 for young people. This study gathered considerable data from many sources. The focus on exploring  
12 the provision of health care for young people over time, within specific teams and specialities, as  
13 well as across an organisation, enabled us to demonstrate the diversity within and across  
14 professional, team, ward and organisational boundaries. However, we only focused on three  
15 different organisations. Notably, all these organisations had a reputation for undertaking research  
16 on the care young people, so may represent examples of 'good practice'. Given the timing of our  
17 fieldwork, we did not get the opportunity to observe the impact of the roll-out of training around  
18 DAH that occurred at the one of the NHS trusts. A potential limitation of the study is that no young  
19 people were interviewed. However there is a large literature of young people's experience in  
20 hospital settings but much less literature focussing on the perspective of health professionals and  
21 particularly of hospital managers.  
22  
23  
24  
25  
26  
27  
28  
29  
30

31  
32 Policy and research has emphasised the centrality of service delivery and workforce capacity issues  
33 to achieve successful integration and consistency of health services for all young people across  
34 organisations [8, 9]. The results presented here add to this evidence base as we observed how the  
35 community of practice, the networks of young person-orientated practitioners and managers also  
36 support and provide, through formal and informal means, training and development around young  
37 people's health. Previous research has shown that continuing medical education in adolescent  
38 health, can increase developmentally appropriate practices (such as confidential services) and has  
39 the potential to address systemic barriers to healthcare for young people.[30] Thus, the role of such  
40 networks may be vital to achieving any sustainable change in the provision of healthcare for young  
41 people. Across all the sites, young people's formal and informal champions were key to getting  
42 people involved in the healthcare of young people. Research has outlined the importance of staff  
43 attitudes as a key determinant of young people's satisfaction with care.[4, 31] Prior research has  
44 also shown the problem of staff turnover, if services rely on key individuals [32,33] . As such, there  
45 needs to be consistency of approach to developing local cultures of good practice that can withstand  
46 changes in personnel. In primary care, the Adolescent Champion model, which trains a  
47 multidisciplinary team of practice staff to deliver training to other staff and implement local quality  
48 improvement, has shown potential for sustainable change [34].  
49  
50  
51  
52  
53  
54  
55  
56  
57  
58  
59  
60

1  
2  
3  
4 Our findings suggest that there is a need for strong and clear guidelines, strategies and policies on  
5 the practical implementation of DAH at three levels: those of the individual young person and their  
6 family, the multidisciplinary team level and the organisation and/or system level. Our research  
7 informed the development of a toolkit for implementation of DAH at these levels which includes  
8 description of the models of good practice in terms of multidisciplinary working and training at the 3  
9 hospitals studied [35,36]. Since the fieldwork ended, additional guidance has been published  
10 including for the care of young people in acute care settings [37] which includes a focus on DAH,  
11 alongside national guidance on the need to implement DAH in relation to transitional care.[18] A  
12 focus on specific settings (like acute care) or contexts (like transition) has limitations as it can  
13 introduce or sustain inequities. Buy-in and formal support from senior managers in both child and  
14 adult services seems essential. Providing an institution-wide strategy and training seems key,  
15 particularly in view of the current unmet training needs reported in both paediatric [38] and adult  
16 physicians [39]. Currently adolescent and young adult medicine is not a recognised discipline in its  
17 own right in the UK unlike Australia and North America [40] although even when it is an established  
18 discipline, challenges remain, for example in the USA [41]. The 'informal' adolescent and young adult  
19 medicine community in the UK may also need to become more formally recognised. Young people  
20 should no longer be seen as 'vary rarely ill' or allowed to remain 'just below the radar', or seen as  
21 'too old' for child services or 'too young' for adult. Core principles underlying the practice of  
22 adolescent medicine, such as DAH, should not remain contested. We need to enable people to  
23 reappraise values and commitment, to understand them as a normal part of everyday service  
24 provision.  
25  
26  
27  
28  
29  
30  
31  
32  
33  
34  
35  
36  
37  
38  
39  
40  
41  
42  
43  
44

## References

1. World Health Organization. Young people's health: a challenge for society. Report of a Study Group on Young People and 'Health for All by the Year 2000', Technical Report Series, No. 731. Geneva: World Health Organization, 1996.
2. Mokdad AH, Forouzanfar MH, Daoud F, et al. Global burden of diseases, injuries, and risk factors for young people's health during 1990–2013: a systematic analysis for the Global Burden of Disease Study 2013. *Lancet* 2016;387:2383–401.
3. Patton GC, Sawyer SM, Santelli JS, et al. Our future: a Lancet commission on adolescent health and wellbeing. *Lancet* 2016;387:2423–78.

- 1  
2  
3 4. Ambresin A-E, Bennett K, Patton GC, et al. Assessment of Youth-Friendly Health Care: A  
4 Systematic Review of Indicators Drawn From Young People's Perspectives. *J Adolesc Health*  
5 2013;52:670–81.
- 6  
7 5. Sawyer SM, Ambresin A-E, Bennett KE, et al. A Measurement Framework for Quality Health  
8 Care for Adolescents in Hospital. *J Adolesc Health* 2014;55:484–90.
- 9  
10 6. Department of Health. You're welcome: Quality criteria for young people friendly services.  
11 2011. [https://www.gov.uk/government/publications/quality-criteria-for-young-people-](https://www.gov.uk/government/publications/quality-criteria-for-young-people-friendly-health-services)  
12 [friendly-health-services](https://www.gov.uk/government/publications/quality-criteria-for-young-people-friendly-health-services) (accessed 13 December 2018)
- 13  
14 7. Hargreaves DS, McDonagh JE, Viner RM. Validation of You're Welcome Quality Criteria for  
15 Adolescent Health Services Using Data From National Inpatient Surveys in England. *J Adolesc*  
16 *Health* 2013;52:50–57
- 17  
18 8. World Health Organization. Towards adolescent-responsive health systems: Steering the  
19 transition from adolescent-friendly projects to adolescent-responsive health systems. 2014.  
20 [http://apps.who.int/adolescent/second-decade/section6/page8/sdolescent-](http://apps.who.int/adolescent/second-decade/section6/page8/sdolescent-responsiveness.html)  
21 [responsiveness.html](http://apps.who.int/adolescent/second-decade/section6/page8/sdolescent-responsiveness.html) (accessed 13 Dec 2018)
- 22  
23 9. Hepburn CM, Cohen E, Bhawra J, et al. Health system strategies supporting transition to  
24 adult care. *Arch Dis Child* 2015;100:559–64.
- 25  
26 10. Hargreaves DS, Greaves F, Levay C, et al Comparison of Health Care Experience and Access  
27 Between Young and Older Adults in 11 High-Income Countries. *J Adolesc Health*. 2015  
28 Oct;57(4):413-20.
- 29  
30 11. Farre A, Wood V, Rapley T, et al. Developmentally appropriate healthcare for young people:  
31 a scoping study. *Arch Dis Child* 2015;100:144–51.
- 32  
33 12. Farre A, Wood V, McDonagh JE, et al. Health professionals' and managers' definitions of  
34 developmentally appropriate healthcare for young people: conceptual dimensions and  
35 embedded controversies. *Arch Dis Child* 2016;101:628–633.
- 36  
37 13. Sawyer SM. Developmentally appropriate healthcare for young people with chronic illness:  
38 Questions of philosophy, policy, and practice. *Pediatr Pulmonol* 2003;36:363–365.
- 39  
40 14. World Health Organisation. Geneva: World Health Organisation; 2002. Adolescent friendly  
41 health services: an agenda for change.
- 42  
43 15. Wright EK, Williams J, Andrews JM et al. Perspectives of paediatric and adult  
44 gastroenterologists on transfer and transition care of adolescents with inflammatory bowel  
45 disease. *Intern Med J*. 2014 May;44(5):490-6.
- 46  
47 16. Stollon N, Zhong Y, Ferris M, et al Chronological age when healthcare transition skills are  
48 mastered in adolescents/young adults with inflammatory bowel disease. *World J*  
49 *Gastroenterol*. 2017 May 14;23(18):3349-3355

17. Eaton CK, Davis MF, Gutierrez-Colina AM, et al Different Demands, Same Goal: Promoting Transition Readiness in Adolescents and Young Adults With and Without Medical Conditions. *J Adolesc Health*. 2017 Jun;60(6):727-733
18. National Institute for Health and Care Excellence (NICE). NICE guidelines [NG43] Transition from children's to adults' services for young people using health or social care services. 2016. <https://www.nice.org.uk/guidance/ng43> (accessed 13 Dec 2018).
19. Sawyer SM, Afifi RA, Bearinger LH, et al. Adolescence: a foundation for future health. *Lancet* 2012;379:1630–40.
20. Viner R. Life stage: Adolescence. In: Davies SC, ed. Annual Report of the Chief Medical Officer 2012, Our Children Deserve Better: Prevention Pays. London: Department of Health 2013. Chapter 8 page 1-11.
21. May C, Finch T. Implementing, Embedding, and Integrating Practices: An Outline of Normalization Process Theory. *Sociology* 2009;43:535–54.
22. Patton MQ. Qualitative research & evaluation methods. London: Sage 2002.
23. Rapley T. Some Pragmatics of Data Analysis. In: Silverman D, ed. Qualitative Research. London: Sage 2016:331-346.
24. Glaser BG. The Constant Comparative Method of Qualitative Analysis. *Soc Probl* 1965;12:436–45.
25. Seale C. The Quality of Qualitative Research. London: Sage 1999.
26. Saunders B, Sim J, Kingstone T, et al. Saturation in qualitative research: exploring its conceptualization and operationalization. *Quality & Quantity*. 2018 Jul 1;52(4):1893-907.
27. Transition Research Programme. <http://research.ncl.ac.uk/transition/index.html> (accessed 13 December 2018).
28. Colver A, McConachie H, Le Couteur A et al . A longitudinal, observational study of the features of transitional healthcare associated with better outcomes for young people with long-term conditions. *BMC Med*. 2018 Jul 23;16(1):111.
29. Wenger, Etienne. Communities of practice: Learning, meaning, and identity. Cambridge University Press, 1999.
30. Sancu L, Coffey C, Patton G, et al. Sustainability of change with quality general practitioner education in adolescent health: a 5-year follow-up. *Med Educ*. 2005;39:557-60.
31. Shaw KL, Watanabe A, Rankin E, et al. Walking the talk. Implementation of transitional care guidance in a UK paediatric and a neighbouring adult facility. *Child Care Health Dev* 2014;40:663-70.



- 1  
2  
3 32. Renju J, Andrew B, Nyalali K, et al . A process evaluation of the scale up of a youth-friendly  
4 health services initiative in northern Tanzania. *Journal of the International AIDS Society*. 2010  
5 Dec;13(1):32.  
6  
7 33. Geary RS, Gómez-Olivé FX, Kahn K, et al. Barriers to and facilitators of the provision of a  
8 youth-friendly health services programme in rural South Africa *BMC Health Serv Res*. 2014  
9 Jun 16;14:259.  
10  
11 34. Riley M, Patterson V, Lane JC, et al. The Adolescent Champion Model: Primary Care Becomes  
12 Adolescent-Centered via Targeted Quality Improvement. *J Pediatr*. 2018;193:229-36.  
13  
14 35. Transition Research Programme. Developmentally Appropriate Healthcare Toolkit. 2017.  
15 [https://www.northumbria.nhs.uk/quality-and-safety/clinical-trials/for-healthcare-](https://www.northumbria.nhs.uk/quality-and-safety/clinical-trials/for-healthcare-professionals/)  
16 [professionals/](https://www.northumbria.nhs.uk/quality-and-safety/clinical-trials/for-healthcare-professionals/) (accessed 13 Dec 2018)  
17  
18 36. McDonagh JE, Farre A, Gleeson H, et al. Making healthcare work for young people. *Arch Dis*  
19 *Child*. 2018 Jun;103(6):623.  
20  
21 37. Royal College of Physicians. Acute Care Toolkit 2015 [www.rcplondon.ac.uk/guidelines-](http://www.rcplondon.ac.uk/guidelines-policy/acute-care-toolkit-13-acute-care-adolescents-and-young-adults)  
22 [policy/acute-care-toolkit-13-acute-care-adolescents-and-young-adults](http://www.rcplondon.ac.uk/guidelines-policy/acute-care-toolkit-13-acute-care-adolescents-and-young-adults) (accessed 13 Dec  
23 2018).  
24  
25 38. Michaud PA, Schrier L, Ross-Russel R, et al. Paediatric departments need to improve  
26 residents' training in adolescent medicine and health: a position paper of the European  
27 Academy of Paediatrics. *Eur J Pediatr*. 2018 Apr;177(4):479-487.  
28  
29 39. Wright RJ, Howard EJ, Newbery N, Gleeson H. Training Gap. The present state of higher  
30 specialist training in adolescent and young adult health in medical specialties in the UK.  
31 *Future Healthcare Journal* 2017 Vol 4, No 2: 80–5  
32  
33 40. Kerem NC, Hardoff D. Adolescent health care education and training: insights from Israel. *Int*  
34 *J Adolesc Med Health*. 2016 Aug 1;28(3):303-7.  
35  
36 41. Jenkins RR. Adolescent medicine in the USA: a perspective on progress and lessons learnt.  
37 *Arch Dis Child*. 2016 Jun;101(6):510-513.  
38  
39  
40  
41  
42  
43  
44  
45  
46  
47  
48  
49  
50  
51  
52  
53  
54  
55  
56  
57  
58  
59  
60

## Standards for Reporting Qualitative Research (SRQR)\*

<http://www.equator-network.org/reporting-guidelines/srqr/>

Page/line no(s).

### Title and abstract

|                                                                                                                                                                                                                                                              |        |
|--------------------------------------------------------------------------------------------------------------------------------------------------------------------------------------------------------------------------------------------------------------|--------|
| <p><b>Title</b> - Concise description of the nature and topic of the study Identifying the study as qualitative or indicating the approach (e.g., ethnography, grounded theory) or data collection methods (e.g., interview, focus group) is recommended</p> | Page 1 |
| <p><b>Abstract</b> - Summary of key elements of the study using the abstract format of the intended publication; typically includes background, purpose, methods, results, and conclusions</p>                                                               | Page 1 |

### Introduction

|                                                                                                                                                                     |        |
|---------------------------------------------------------------------------------------------------------------------------------------------------------------------|--------|
| <p><b>Problem formulation</b> - Description and significance of the problem/phenomenon studied; review of relevant theory and empirical work; problem statement</p> | Page 4 |
| <p><b>Purpose or research question</b> - Purpose of the study and specific objectives or questions</p>                                                              | Page 4 |

### Methods

|                                                                                                                                                                                                                                                                                                                                                                                                             |        |
|-------------------------------------------------------------------------------------------------------------------------------------------------------------------------------------------------------------------------------------------------------------------------------------------------------------------------------------------------------------------------------------------------------------|--------|
| <p><b>Qualitative approach and research paradigm</b> - Qualitative approach (e.g., ethnography, grounded theory, case study, phenomenology, narrative research) and guiding theory if appropriate; identifying the research paradigm (e.g., postpositivist, constructivist/ interpretivist) is also recommended; rationale**</p>                                                                            | Page 5 |
| <p><b>Researcher characteristics and reflexivity</b> - Researchers' characteristics that may influence the research, including personal attributes, qualifications/experience, relationship with participants, assumptions, and/or presuppositions; potential or actual interaction between researchers' characteristics and the research questions, approach, methods, results, and/or transferability</p> | Page 5 |
| <p><b>Context</b> - Setting/site and salient contextual factors; rationale**</p>                                                                                                                                                                                                                                                                                                                            | Page 5 |
| <p><b>Sampling strategy</b> - How and why research participants, documents, or events were selected; criteria for deciding when no further sampling was necessary (e.g., sampling saturation); rationale**</p>                                                                                                                                                                                              | Page 5 |
| <p><b>Ethical issues pertaining to human subjects</b> - Documentation of approval by an appropriate ethics review board and participant consent, or explanation for lack thereof; other confidentiality and data security issues</p>                                                                                                                                                                        | Page 5 |
| <p><b>Data collection methods</b> - Types of data collected; details of data collection procedures including (as appropriate) start and stop dates of data collection and analysis, iterative process, triangulation of sources/methods, and modification of procedures in response to evolving study findings; rationale**</p>                                                                             | Page 5 |

|    |                                                                                         |                 |
|----|-----------------------------------------------------------------------------------------|-----------------|
| 1  |                                                                                         |                 |
| 2  |                                                                                         |                 |
| 3  | <b>Data collection instruments and technologies</b> - Description of instruments (e.g., |                 |
| 4  | interview guides, questionnaires) and devices (e.g., audio recorders) used for data     |                 |
| 5  | collection; if/how the instrument(s) changed over the course of the study               | Page 5          |
| 6  |                                                                                         |                 |
| 7  | <b>Units of study</b> - Number and relevant characteristics of participants, documents, |                 |
| 8  | or events included in the study; level of participation (could be reported in results)  | Page 6, Table 1 |
| 9  |                                                                                         |                 |
| 10 | <b>Data processing</b> - Methods for processing data prior to and during analysis,      |                 |
| 11 | including transcription, data entry, data management and security, verification of      |                 |
| 12 | data integrity, data coding, and anonymization/de-identification of excerpts            | Page 6          |
| 13 |                                                                                         |                 |
| 14 | <b>Data analysis</b> - Process by which inferences, themes, etc., were identified and   |                 |
| 15 | developed, including the researchers involved in data analysis; usually references a    |                 |
| 16 | specific paradigm or approach; rationale**                                              | Page 6          |
| 17 |                                                                                         |                 |
| 18 | <b>Techniques to enhance trustworthiness</b> - Techniques to enhance trustworthiness    |                 |
| 19 | and credibility of data analysis (e.g., member checking, audit trail, triangulation);   |                 |
| 20 | rationale**                                                                             | Page 6          |

## Results/findings

|    |                                                                                             |           |
|----|---------------------------------------------------------------------------------------------|-----------|
| 23 | <b>Synthesis and interpretation</b> - Main findings (e.g., interpretations, inferences, and |           |
| 24 | themes); might include development of a theory or model, or integration with                |           |
| 25 | prior research or theory                                                                    | Page 6-12 |
| 26 |                                                                                             |           |
| 27 | <b>Links to empirical data</b> - Evidence (e.g., quotes, field notes, text excerpts,        |           |
| 28 | photographs) to substantiate analytic findings                                              | Page 6-12 |
| 29 |                                                                                             |           |

## Discussion

|    |                                                                                           |            |
|----|-------------------------------------------------------------------------------------------|------------|
| 32 | <b>Integration with prior work, implications, transferability, and contribution(s) to</b> |            |
| 33 | <b>the field</b> - Short summary of main findings; explanation of how findings and        |            |
| 34 | conclusions connect to, support, elaborate on, or challenge conclusions of earlier        |            |
| 35 | scholarship; discussion of scope of application/generalizability; identification of       |            |
| 36 | unique contribution(s) to scholarship in a discipline or field                            | Page 12-14 |
| 37 |                                                                                           |            |
| 38 | <b>Limitations</b> - Trustworthiness and limitations of findings                          | Page 13    |
| 39 |                                                                                           |            |

## Other

|    |                                                                                            |        |
|----|--------------------------------------------------------------------------------------------|--------|
| 42 | <b>Conflicts of interest</b> - Potential sources of influence or perceived influence on    |        |
| 43 | study conduct and conclusions; how these were managed                                      | Page 3 |
| 44 |                                                                                            |        |
| 45 | <b>Funding</b> - Sources of funding and other support; role of funders in data collection, |        |
| 46 | interpretation, and reporting                                                              | Page 3 |
| 47 |                                                                                            |        |

\*The authors created the SRQR by searching the literature to identify guidelines, reporting standards, and critical appraisal criteria for qualitative research; reviewing the reference lists of retrieved sources; and contacting experts to gain feedback. The SRQR aims to improve the transparency of all aspects of qualitative research by providing clear standards for reporting qualitative research.

1  
2  
3  
4  
5  
6  
7  
8  
9  
10  
11  
12  
13  
14  
15  
16  
17  
18  
19  
20  
21  
22  
23  
24  
25  
26  
27  
28  
29  
30  
31  
32  
33  
34  
35  
36  
37  
38  
39  
40  
41  
42  
43  
44  
45  
46  
47  
48  
49  
50  
51  
52  
53  
54  
55  
56  
57  
58  
59  
60

\*\*The rationale should briefly discuss the justification for choosing that theory, approach, method, or technique rather than other options available, the assumptions and limitations implicit in those choices, and how those choices influence study conclusions and transferability. As appropriate, the rationale for several items might be discussed together.

**Reference:**

O'Brien BC, Harris IB, Beckman TJ, Reed DA, Cook DA. **Standards for reporting qualitative research: a synthesis of recommendations.** *Academic Medicine*, Vol. 89, No. 9 / Sept 2014  
DOI: 10.1097/ACM.0000000000000388

For peer review only
